# Supplementary material
Source: PubMed Central journal article supplement (PMC5675524)
Supplement: NIHMS916255-supplement-SI.pdf [file NIHMS916255-supplement-SI.pdf]

# Experimental and DFT Investigations Reveal the Influence of the Outer Coordination Sphere on the Vibrational Spectra of Nickel-Substituted Rubredoxin, a Model Hydrogenase Enzyme

Jeffrey W. Slater<sup>‡</sup>, Sean C. Marguet<sup>‡</sup>, Sabrina L. Cirino, Pearson T. Maugeri, Hannah S. Shafaat\*

## Supporting Information

### *Table of Contents*

|                                                                                                                            |         |
|----------------------------------------------------------------------------------------------------------------------------|---------|
| Resonance Raman power dependence.....                                                                                      | S3      |
| Resonance Raman raw data and buffer subtraction procedure.....                                                             | S4      |
| Resonance Raman raw data and ZnRd-subtraction procedure.....                                                               | S5      |
| Gaussian decomposition of the NiRd RR spectrum with tabulated peak positions.....                                          | S6      |
| DFT optimized geometries of the three active site models.....                                                              | S7      |
| DFT optimized geometries of the Ni <sup>II</sup> Rd with and without constraints.....                                      | S8      |
| TD-DFT of the unconstrained Ni <sup>II</sup> Rd model.....                                                                 | S9      |
| DFT optimized geometries of Ni <sup>II</sup> Rd comparing SVP and TZVP basis sets.....                                     | S10     |
| Tabulated geometries of NiRd crystal structure (1R0J) and all computational models.....                                    | S11     |
| TD-DFT results from different size Ni <sup>II</sup> Rd models.....                                                         | S12     |
| Methodology for calculation of reduction potentials.....                                                                   | S13     |
| Surface plot illustrating solvent exposure of full Ni <sup>II</sup> Rd model.....                                          | S14     |
| Calculated Ni <sup>III/II</sup> reduction potential as a function of COSMO dielectric constant.....                        | S15     |
| Semi-quantitative molecular orbital diagrams for full Ni <sup>II</sup> Rd and Ni <sup>III</sup> Rd models.....             | S16     |
| DFT-optimized geometries of full and NACA Ni <sup>II</sup> Rd models.....                                                  | S17     |
| DFT-optimized geometries of full and backbone Ni <sup>II</sup> Rd models.....                                              | S18     |
| DFT-optimized geometries of full Ni <sup>II</sup> Rd and Ni <sup>III</sup> Rd models.....                                  | S19     |
| Tabulated TD-DFT results for full and backbone Ni <sup>II</sup> Rd models.....                                             | S20     |
| Comparison of TD-DFT results and transition difference densities between full and backbone Ni <sup>II</sup> Rd models..... | S21     |
| TD-DFT of the Ni <sup>II</sup> Rd crystal structure.....                                                                   | S22     |
| Calculated and experimental vibrational frequencies for the full Ni <sup>II</sup> Rd model.....                            | S23-S24 |
| Comparison between experimental and calculated RR spectra for mode assignments.....                                        | S25     |
| Isotope-dependent resonance Raman spectra with 364 nm, 407 nm, and 488 nm excitation.....                                  | S26     |
| Calculated and experimental RR spectra upon H/D exchange.....                                                              | S27     |
| Potentiometric titrations as a function of pH.....                                                                         | S28     |
| Calculated energies for [FeCp <sub>2</sub> ] <sup>0/+</sup> reduction potential.....                                       | S39     |
| Calculated energies for Ni <sup>III/II</sup> Rd reduction potential.....                                                   | S30     |
| Ni <sup>III</sup> Rd X-band EPR spectrum, molecular orbital, and spin density plots.....                                   | S31     |
| Calculated full and backbone resonance Raman spectra of Ni <sup>II</sup> Rd.....                                           | S32     |
| Calculated IR spectra of full Ni <sup>II</sup> Rd model with <sup>58/60</sup> Ni exchange.....                             | S33     |
| Normal mode vector displacements of Ni <sup>II</sup> Rd.....                                                               | S34     |
| Idealized d-orbital splitting diagram for T <sub>d</sub> d <sup>8</sup> system.....                                        | S35     |
| Calculated IR spectra of full Ni <sup>II</sup> Rd model with H/D exchange.....                                             | S36     |
| DFT-optimized geometries of backbone Ni <sup>II</sup> Rd and Ni <sup>III</sup> Rd models.....                              | S37     |
| Sample input file for geometry optimization and vibrational frequency calculation.....                                     | S38     |
| Sample input file for TD-DFT calculation.....                                                                              | S39     |
| Sample input file for ORCA ASA calculation.....                                                                            | S40     |
| Sample input file for single-point energy calculation with solvation.....                                                  | S41     |
| Sample input file for EPR g-tensor calculation with solvation.....                                                         | S42     |
| Cartesian coordinates of the DFT geometry-optimized full Ni <sup>II</sup> Rd model in the gas phase.....                   | S43-S46 |

|                                                                                                                            |         |
|----------------------------------------------------------------------------------------------------------------------------|---------|
| Cartesian coordinates of the DFT geometry-optimized backbone Ni <sup>II</sup> Rd model in the gas phase                    | S47-S49 |
| Cartesian coordinates of the DFT geometry-optimized NACA Ni <sup>II</sup> Rd model in the gas phase                        | S50-S52 |
| Cartesian coordinates of the DFT geometry-optimized full Ni <sup>II</sup> Rd model without constraints<br>in the gas phase | S53-S56 |
| Cartesian coordinates of the DFT geometry-optimized full Ni <sup>III</sup> Rd model in the gas phase                       | S57-S60 |
| Cartesian coordinates of the DFT geometry-optimized backbone Ni <sup>III</sup> Rd model in the gas phase                   | S61-S63 |
| Cartesian coordinates of the DFT geometry-optimized [FeCp <sub>2</sub> ] in the gas phase                                  | S64     |
| Cartesian coordinates of the DFT geometry-optimized [FeCp <sub>2</sub> ] <sup>+</sup> in the gas phase                     | S65     |
| Supplemental references                                                                                                    | S66     |

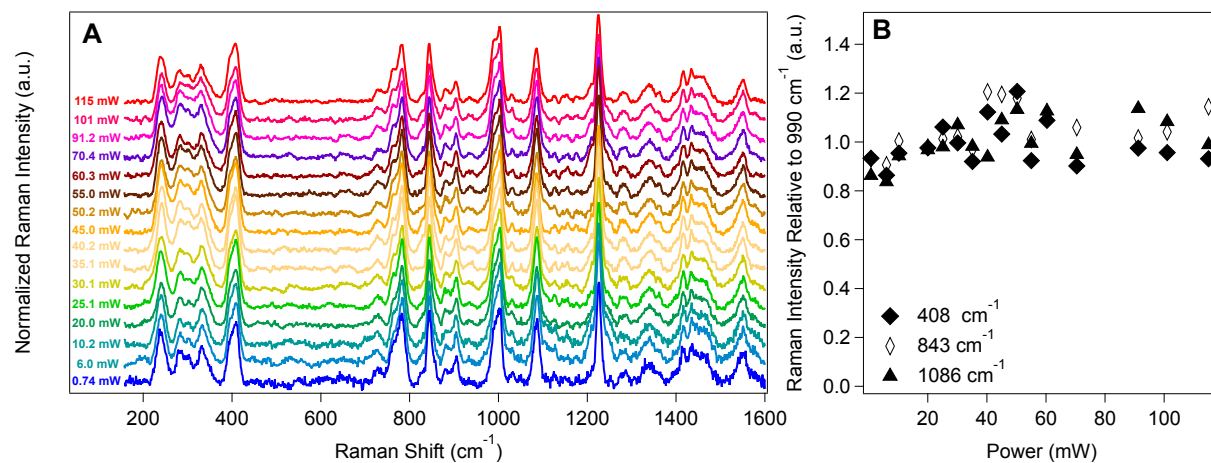

**Figure S1.** Power dependence of resonance Raman spectra of NiRd ( $\lambda_{\text{ex}} = 458 \text{ nm}$ ). (A) Spectra of NiRd at various laser powers normalized to the non-resonant phosphate buffer peak at  $990 \text{ cm}^{-1}$ . (B) Comparison of NiRd band intensities at  $408 \text{ cm}^{-1}$ ,  $843 \text{ cm}^{-1}$ , and  $1086 \text{ cm}^{-1}$  relative to the phosphate peak at  $990 \text{ cm}^{-1}$  as a function of laser power.

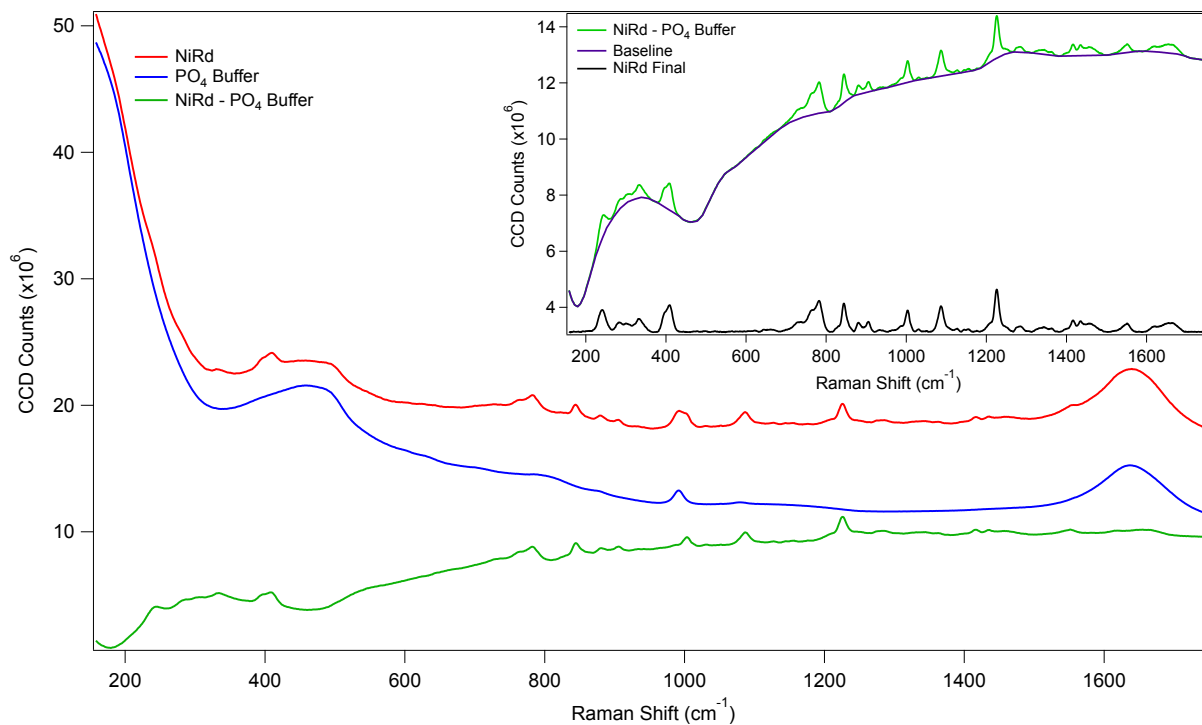

**Figure S2.** Summed raw resonance Raman spectra of NiRd (red) and phosphate buffer (blue) and the corresponding data workup.  $\lambda_{\text{ex}} = 458 \text{ nm}$ ;  $P_{\text{ex}} = 30 \text{ mW}$ ;  $t_{\text{collection}} = 2 \text{ hrs}$  each sample. The buffer-corrected spectrum (green) was generated by subtracting a sufficient ratio of the buffer spectrum from the NiRd spectrum to remove features attributed to non-resonant buffer peaks (e.g., the  $\text{HPO}_4^{2-}$  peak at  $1000 \text{ cm}^{-1}$ ). (*Inset*) A spline baseline (purple) was subtracted from the buffer-corrected NiRd spectrum to remove any remaining broad features attributed to fluorescence, glass peaks, or non-sample based scattering, giving the final, corrected NiRd spectrum (black).



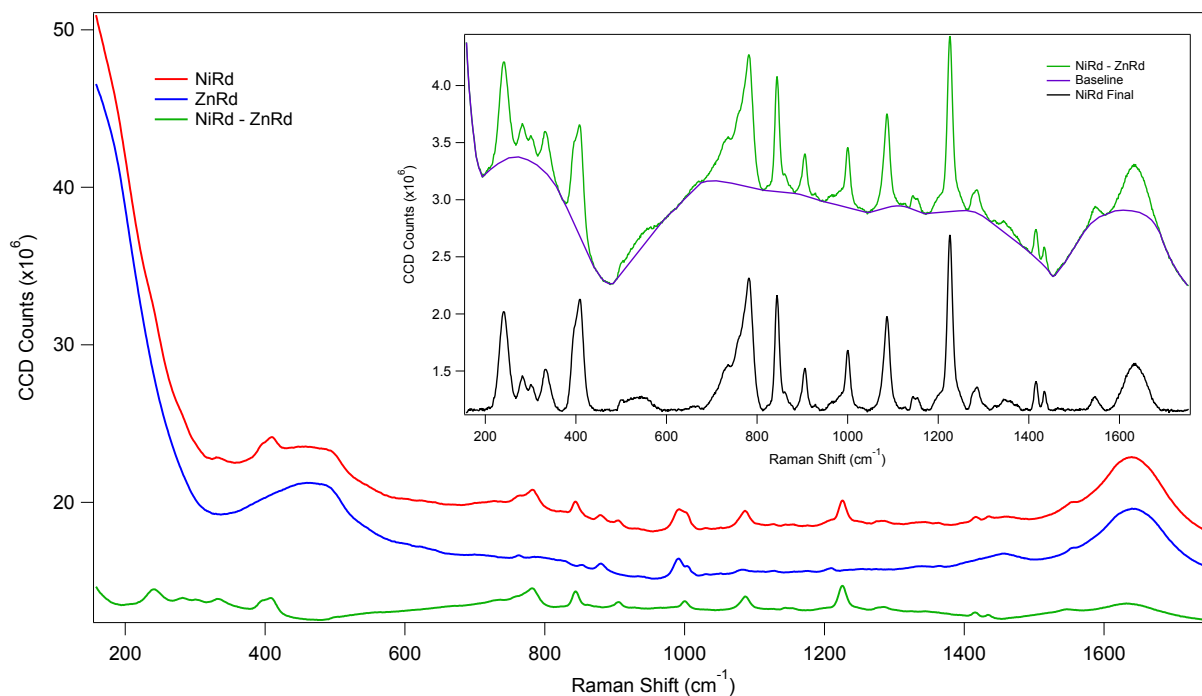

**Figure S3.** Summed raw resonance Raman spectra of NiRd (red) and ZnRd (blue) and the corresponding data workup.  $\lambda_{\text{ex}} = 458 \text{ nm}$ ;  $P_{\text{ex}} = 30 \text{ mW}$ ;  $t_{\text{collection}} = 2 \text{ hrs}$  each sample. The ZnRd-subtracted spectrum (green) was generated by subtracting a sufficient ratio of the ZnRd spectrum from the NiRd spectrum to remove features attributed to non-resonant protein peaks (e.g., the phenylalanine peak at  $1004 \text{ cm}^{-1}$ ). (*Inset*) A spline baseline (purple) was subtracted from the ZnRd-corrected NiRd spectrum to remove any remaining broad features attributed to fluorescence, glass peaks, or non-sample based scattering, giving the final NiRd spectrum with bands that are solely attributed to resonance enhancement of the nickel-thiolate active site (black).

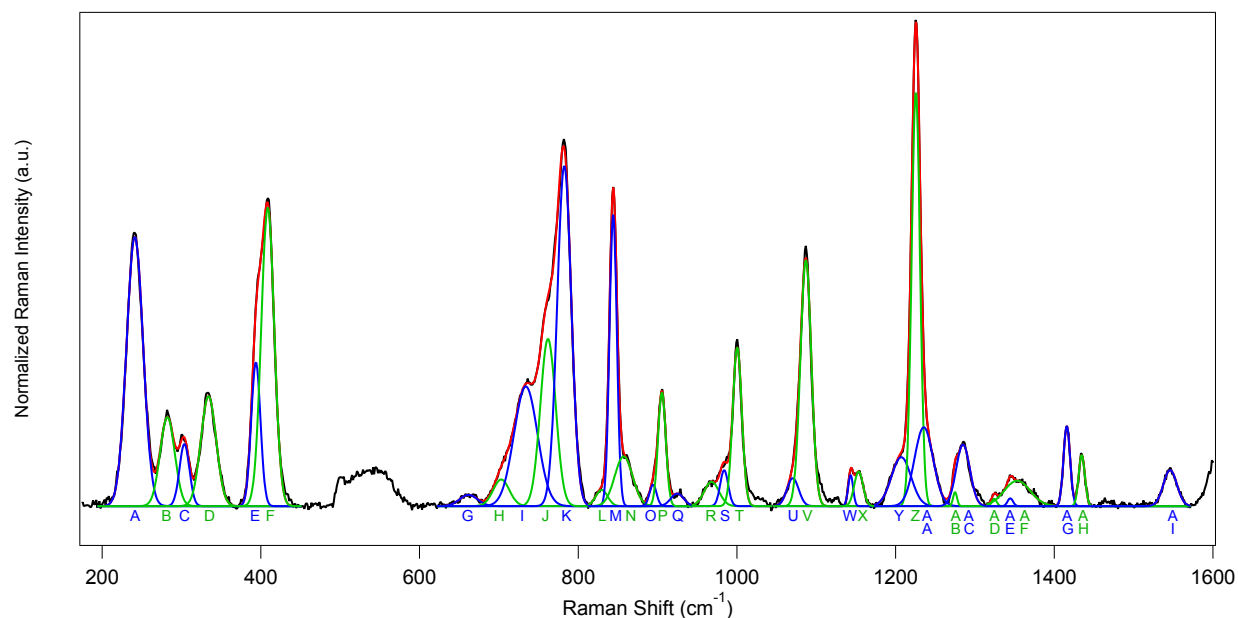

|                            |       |        |        |        |        |        |       |        |        |        |        |        |        |        |        |        |       |      |
|----------------------------|-------|--------|--------|--------|--------|--------|-------|--------|--------|--------|--------|--------|--------|--------|--------|--------|-------|------|
|                            | A     | B      | C      | D      | E      | F      | G     | H      | I      | J      | K      | L      | M      | N      | O      | P      | Q     | R    |
| Center (cm <sup>-1</sup> ) | 241.1 | 282.1  | 303.6  | 334    | 393.6  | 408.6  | 661.7 | 702.9  | 733.8  | 761.9  | 782.3  | 829.5  | 844    | 857.2  | 894.2  | 905.4  | 924.7 | 968  |
| Width (cm <sup>-1</sup> )  | 24.4  | 21.6   | 14.6   | 22.7   | 13.7   | 19.1   | 26.6  | 24.1   | 34.7   | 22.7   | 20.9   | 17.5   | 10.8   | 26.5   | 10.5   | 11.4   | 19.1  | 22.1 |
|                            | S     | T      | U      | V      | W      | X      | Y     | Z      | AA     | AB     | AC     | AD     | AE     | AF     | AG     | AH     | AI    |      |
| Center (cm <sup>-1</sup> ) | 983.7 | 1000.4 | 1070.4 | 1086.8 | 1143.2 | 1153.3 | 1207  | 1225.4 | 1235.5 | 1274.9 | 1284.9 | 1324.3 | 1344.5 | 1353.2 | 1415.7 | 1434.6 | 1546  |      |
| Width (cm <sup>-1</sup> )  | 11.8  | 13.5   | 17.4   | 16.2   | 7.25   | 13     | 28.9  | 12.4   | 27.5   | 5.84   | 20.27  | 7.05   | 7.9    | 38.6   | 9.74   | 9.12   | 20    |      |

**Figure S4.** Gaussian decomposition of resonance Raman spectrum of NiRd (458 nm excitation). Bands were fit to a sum of overlapping Gaussian functions (red) and decomposed into individual peaks (blue or green). Each peak is labeled with a letter, and the corresponding peak positions and widths are given in the table below.

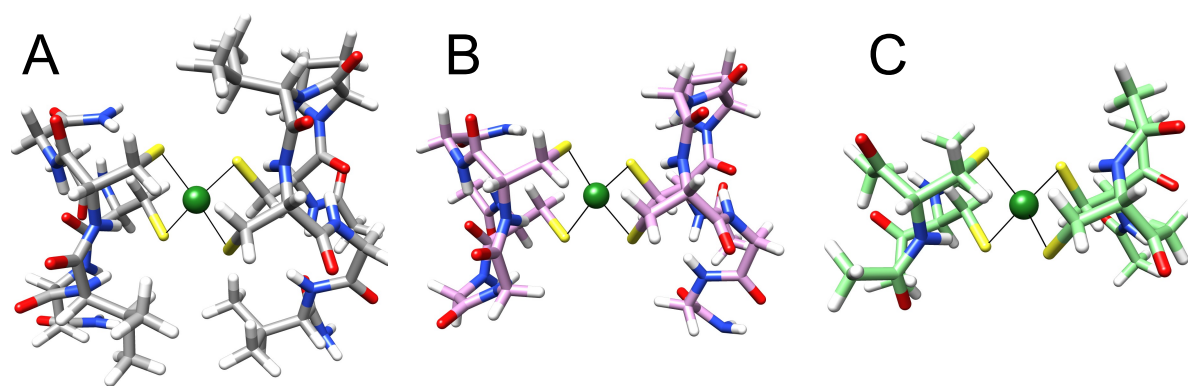

**Figure S5.** Optimized geometries of the different Ni<sup>II</sup>Rd models used in the DFT calculations with all atoms shown. (A) Full Ni<sup>II</sup>Rd model; (B) Backbone Ni<sup>II</sup>Rd model; and (C) [Ni<sup>II</sup>(NACA)<sub>4</sub>]<sup>2-</sup> model.

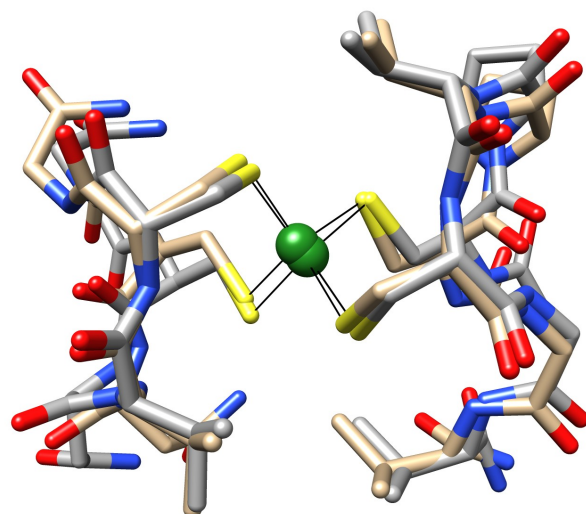

**Figure S6.** DFT-optimized geometries of the full Ni<sup>II</sup>Rd model (gray) overlaid with the unconstrained Ni<sup>II</sup>Rd model (tan). Hydrogen atoms are omitted for clarity.

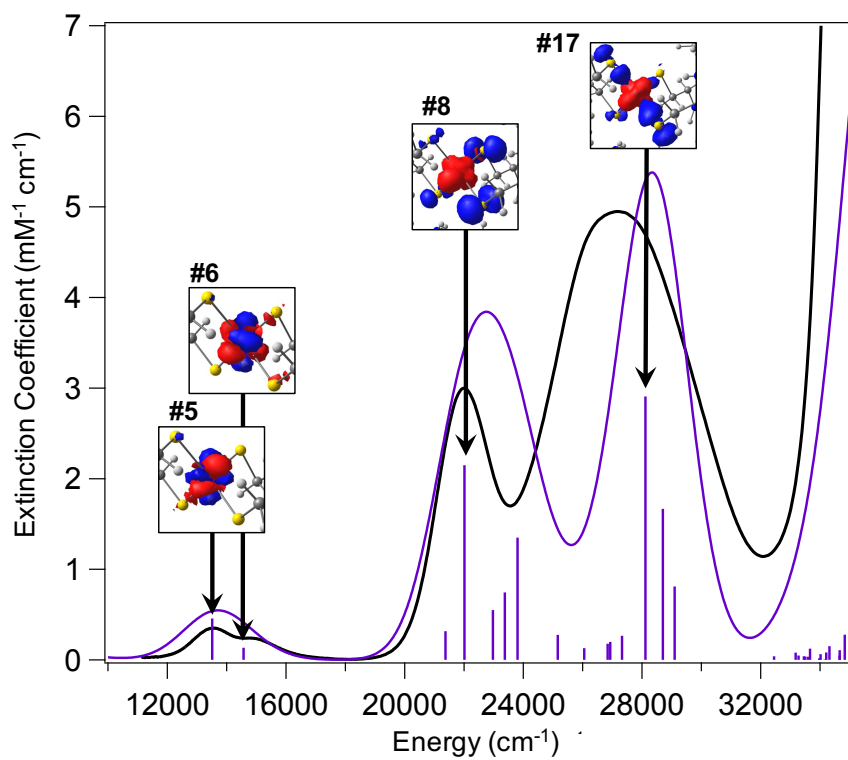

**Figure S7.** Optical absorption spectrum (black) of Ni<sup>II</sup>Rd overlaid with TD-DFT-calculated optical transitions for the full unconstrained model of Ni<sup>II</sup>Rd (purple). Electron difference densities for indicated transitions are shown; blue reflects negative electron density in the excited state while red reflects positive density.

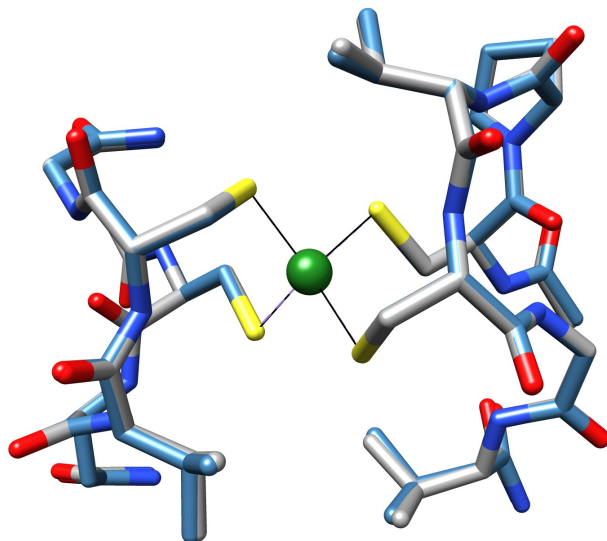

**Figure S8.** DFT-optimized geometries of the full Ni<sup>II</sup>Rd model optimized with the SVP basis set (gray) and the TZVP basis set (dark blue) used for the non-coordinating atoms. The def2-TZVPP basis set was used for the nickel and sulfur atoms in both cases. Hydrogen atoms are omitted for clarity.

**Table S1.** Tabulated bond lengths, bond angles, and hydrogen-bonding distances in the *Cp* Ni<sup>II</sup>Rd crystal structure (PDB 1R0J) and the following DFT geometry-optimized models: full Ni<sup>II</sup>Rd, backbone Ni<sup>II</sup>Rd, full Ni<sup>III</sup>Rd, backbone Ni<sup>III</sup>Rd, [Ni<sup>II</sup>(NACA)<sub>4</sub>]<sup>2-</sup>, and low-spin (S=0) Ni<sup>II</sup>Rd.

|                                     | 1R0J    | Full Ni(II)Rd |                     |           |                    | Ni(II)Rd-Backbone |                     |                     | Full Ni(III)Rd |                     | Ni(III)Rd-Backbone |                     | NACA Ni(II)Rd |                     | Ni(II)Rd low spin |                     |
|-------------------------------------|---------|---------------|---------------------|-----------|--------------------|-------------------|---------------------|---------------------|----------------|---------------------|--------------------|---------------------|---------------|---------------------|-------------------|---------------------|
|                                     | X-Ray   | B3LYP         | ΔB3LYP <sup>a</sup> | Def2-TZVP | ΔTZVP <sup>a</sup> | B3LYP             | ΔB3LYP <sup>a</sup> | ΔB3LYP <sup>b</sup> | B3LYP          | ΔB3LYP <sup>b</sup> | B3LYP              | ΔB3LYP <sup>c</sup> | B3LYP         | ΔB3LYP <sup>b</sup> | B3LYP             | ΔB3LYP <sup>b</sup> |
| Bond Lengths (Å)                    |         |               |                     |           |                    |                   |                     |                     |                |                     |                    |                     |               |                     |                   |                     |
| Ni-S <sub>6</sub>                   | 2.254   | 2.345         | 0.091               | 2.341     | -0.004             | 2.335             | 0.081               | -0.010              | 2.234          | -0.111              | 2.227              | -0.108              | 2.318         | -0.027              | 2.329             | -0.016              |
| Ni-S <sub>9</sub>                   | 2.381   | 2.282         | -0.099              | 2.278     | -0.004             | 2.294             | -0.087              | 0.012               | 2.204          | -0.078              | 2.212              | -0.082              | 2.297         | 0.025               | 2.270             | -0.012              |
| Ni-S <sub>32</sub>                  | 2.477   | 2.332         | -0.145              | 2.331     | -0.001             | 2.359             | -0.118              | 0.027               | 2.217          | -0.115              | 2.234              | -0.125              | 2.318         | -0.014              | 2.312             | -0.020              |
| Ni-S <sub>35</sub>                  | 2.134   | 2.287         | 0.153               | 2.285     | -0.002             | 2.285             | 0.151               | -0.002              | 2.198          | -0.089              | 2.209              | -0.076              | 2.290         | 0.003               | 2.277             | -0.010              |
| Angle (°)                           |         |               |                     |           |                    |                   |                     |                     |                |                     |                    |                     |               |                     |                   |                     |
| S <sub>6</sub> -Ni-S <sub>9</sub>   | 121.449 | 111.148       | -10.301             | 109.9     | -1.248             | 119.790           | -1.659              | 8.642               | 108.494        | -2.654              | 110.072            | -9.718              | 109.078       | -2.07               | 110.765           | -0.383              |
| S <sub>6</sub> -Ni-S <sub>32</sub>  | 116.046 | 111.360       | -4.686              | 112.4     | 1.360              | 110.606           | -5.440              | -0.754              | 116.913        | 5.553               | 115.930            | 5.324               | 110.383       | -0.977              | 114.282           | 2.922               |
| S <sub>6</sub> -Ni-S <sub>35</sub>  | 105.050 | 98.381        | -6.669              | 98.8      | 0.481              | 93.527            | -11.523             | -4.854              | 95.218         | -3.163              | 93.454             | -0.073              | 98.573        | 0.192               | 97.516            | -0.865              |
| S <sub>9</sub> -Ni-S <sub>32</sub>  | 101.833 | 94.900        | -6.933              | 94.9      | 0.000              | 96.997            | -4.836              | 2.097               | 95.743         | 0.843               | 96.438             | -0.559              | 98.523        | 3.923               | 94.418            | -0.482              |
| S <sub>9</sub> -Ni-S <sub>35</sub>  | 104.128 | 129.468       | 25.340              | 129.6     | 0.168              | 127.166           | 23.038              | -2.302              | 137.256        | 7.788               | 138.082            | 10.916              | 114.432       | -15.036             | 130.000           | 0.532               |
| S <sub>32</sub> -Ni-S <sub>35</sub> | 107.107 | 111.692       | 4.585               | 111.5     | -0.292             | 108.676           | 1.569               | -3.016              | 104.649        | -7.043              | 103.885            | -4.791              | 125.585       | 13.893              | 110.730           | -0.962              |
| Hydrogen Bonding <sup>d</sup>       |         |               |                     |           |                    |                   |                     |                     |                |                     |                    |                     |               |                     |                   |                     |
| CYS6-VAL8                           | 3.629   | 3.557         | -0.072              | 3.549     | -0.008             | 3.449             | -0.180              | -0.108              | 3.614          | 0.057               | 3.585              | 0.136               | -----         | -----               | 3.537             | -0.020              |
| CYS6-CYS9                           | 3.672   | 3.676         | 0.004               | 3.649     | -0.027             | 3.609             | -0.063              | -0.067              | 3.521          | -0.155              | 3.595              | -0.014              | 3.399         | -0.277              | 3.629             | -0.047              |
| CYS9-TYR11                          | 3.543   | 3.314         | -0.229              | 3.296     | -0.018             | 3.437             | -0.106              | 0.123               | 3.393          | 0.079               | 3.367              | -0.070              | -----         | -----               | 3.315             | 0.001               |
| CYS32-VAL34                         | 3.513   | 3.436         | -0.077              | 3.464     | 0.028              | 3.345             | -0.168              | -0.091              | 3.471          | 0.035               | 3.361              | 0.016               | -----         | -----               | 3.413             | -0.023              |
| CYS32-CYS35                         | 3.580   | 3.493         | -0.087              | 3.506     | 0.013              | 3.496             | -0.084              | 0.003               | 3.364          | -0.129              | 3.352              | -0.144              | 3.522         | 0.029               | 3.467             | -0.026              |
| CYS35-VAL37                         | 4.077   | 3.649         | -0.428              | 3.631     | -0.018             | 3.536             | -0.541              | -0.113              | 3.510          | -0.139              | 3.441              | -0.095              | -----         | -----               | 3.598             | -0.051              |

<sup>a</sup>Compared to the X-ray crystal structure

<sup>b</sup>Compared to the full Ni<sup>II</sup>Rd structure

<sup>c</sup>Compared to the backbone Ni<sup>II</sup>Rd structure

<sup>d</sup>Distances reflect heavy-atom separation distances, e.g., d(S-N)

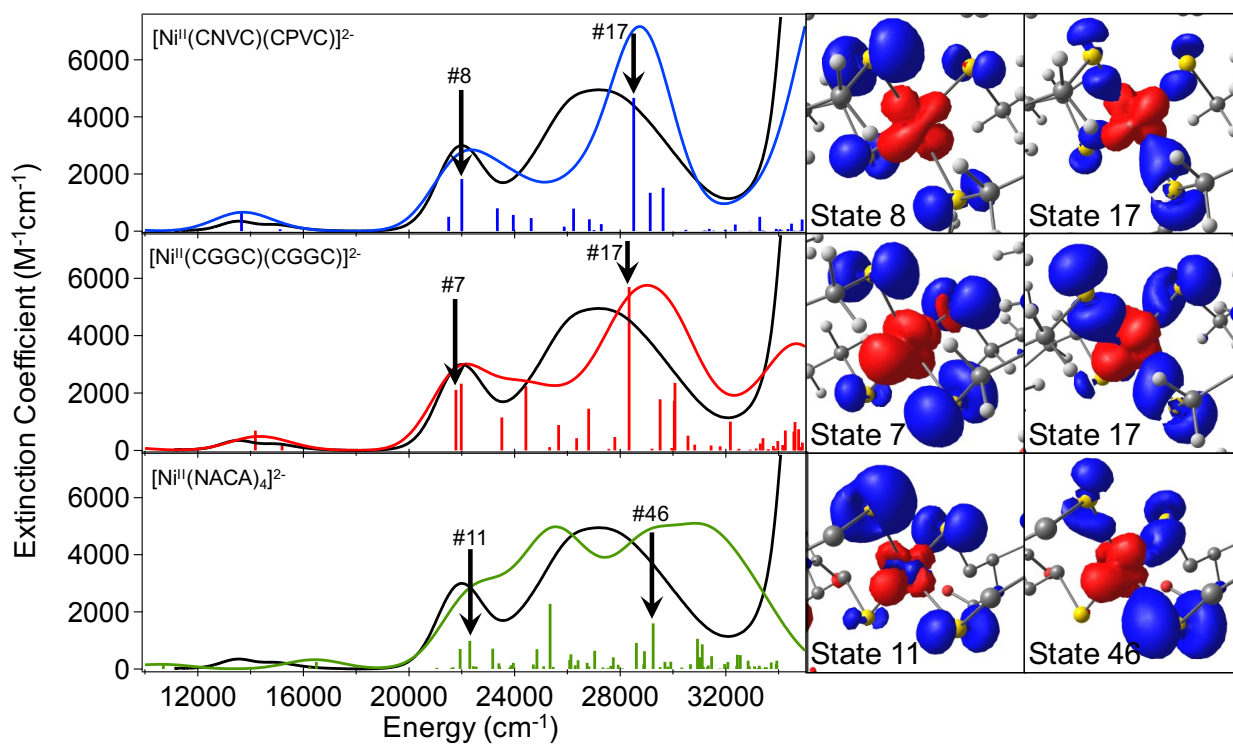

**Figure S9.** (Left) Optical absorption spectrum of  $Ni^{II}Rd$  (black) overlaid with TD-DFT-calculated optical spectra for the full  $[Ni^{II}(CNVC)(CPVC)]^{2-}$   $Ni^{II}Rd$  model (blue), the backbone  $[Ni^{II}(CGGC)(CGGC)]^{2-}$   $Ni^{II}Rd$  model (red), and the  $[Ni^{II}(NACA)_4]^{2-}$  model (green); a  $+1,500\text{ cm}^{-1}$  offset was applied only to the  $[Ni^{II}(NACA)_4]^{2-}$  model spectrum. (Right) Electronic difference density plots for the indicated transitions; blue reflects negative electron density in the excited state while red reflects positive density.



## Methodology for calculating reduction potentials

The reduction potential of the Ni<sup>III/II</sup>Rd one-electron couple was calculated from the optimized gas-phase structure ([Ni<sup>II</sup>Rd<sub>(g)</sub>]<sup>2-</sup>) using the thermodynamic cycle given below (Scheme S1).

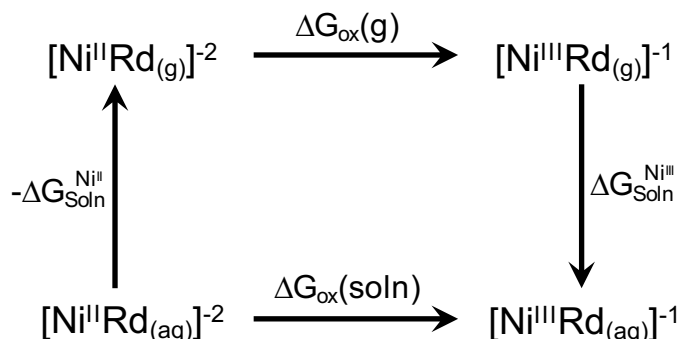

**Scheme S1.** Thermodynamic cycle used to calculate reduction potential of Ni<sup>III/II</sup>Rd couple.

The reduction potential of the Ni<sup>III/II</sup>Rd couple was calculated by considering the solution-phase free energy changes,  $\Delta G_{\text{ox}}(\text{soln})$ , from the nickel(II) to the nickel(III) state using eq. 1:<sup>1</sup>

$$E_{\text{Calc}}^{\text{Ni(III/II)}} = \frac{\Delta G_{\text{ox}}(\text{soln})}{nF} \quad (1)$$

where  $F$  is Faraday's constant (96,487 C/mol) and  $n$  is the number of moles of electrons involved in the reaction ( $n = 1$ ).

$\Delta G_{\text{ox}}(\text{g})$  is calculated by considering the difference in the Gibbs free energy between Ni<sup>II</sup>Rd and Ni<sup>III</sup>Rd obtained directly from the vibrational frequency calculation.  $\Delta G_{\text{soln}}^{\text{Ni(III)}}$  and  $\Delta G_{\text{soln}}^{\text{Ni(II)}}$  are solvation energies determined by taking the difference in total electronic energies between the gas-phase structure and the solvated, gas-phase geometry. The sum of the three values in eq. 2 are equal to  $\Delta G_{\text{ox}}(\text{soln})$ .

$$\Delta G_{\text{ox}}(\text{soln}) = -\Delta G_{\text{soln}}^{\text{Ni(II)}} + \Delta G_{\text{ox}}(\text{g}) + \Delta G_{\text{soln}}^{\text{Ni(III)}} \quad (2)$$

The reduction potential, which is the inverse of the oxidation potential, is reported relative to the standard hydrogen electrode (SHE) using eq 3. The calculated SHE absolute potential,  $E_{\text{SHE}}^{\text{H}^+/\text{H}_2}$  (V), of 4.281 V was used.<sup>2</sup>

$$E_{\text{Calc,SHE}}^{\text{Ni(III/II)}} (\text{V. vs SHE}) = E_{\text{Calc}}^{\text{Ni(III/II)}} (\text{V.}) - E_{\text{SHE}}^{\text{H}^+/\text{H}_2} (\text{V.}) \quad (3)$$

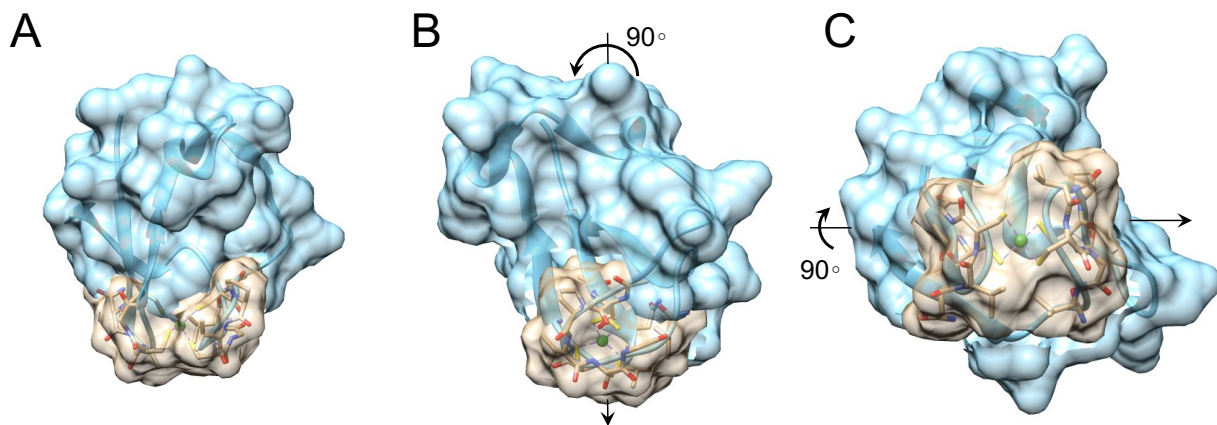

**Figure S10.** Different snapshots of the van der Waals surface of the crystal structure of *Dd* Rd (blue) and the full active site computational model of NiRd (tan). (A) Top-down view of the protein; (B) Protein rotated 90° along one axis; (C) Protein rotated 90° along the other axis.

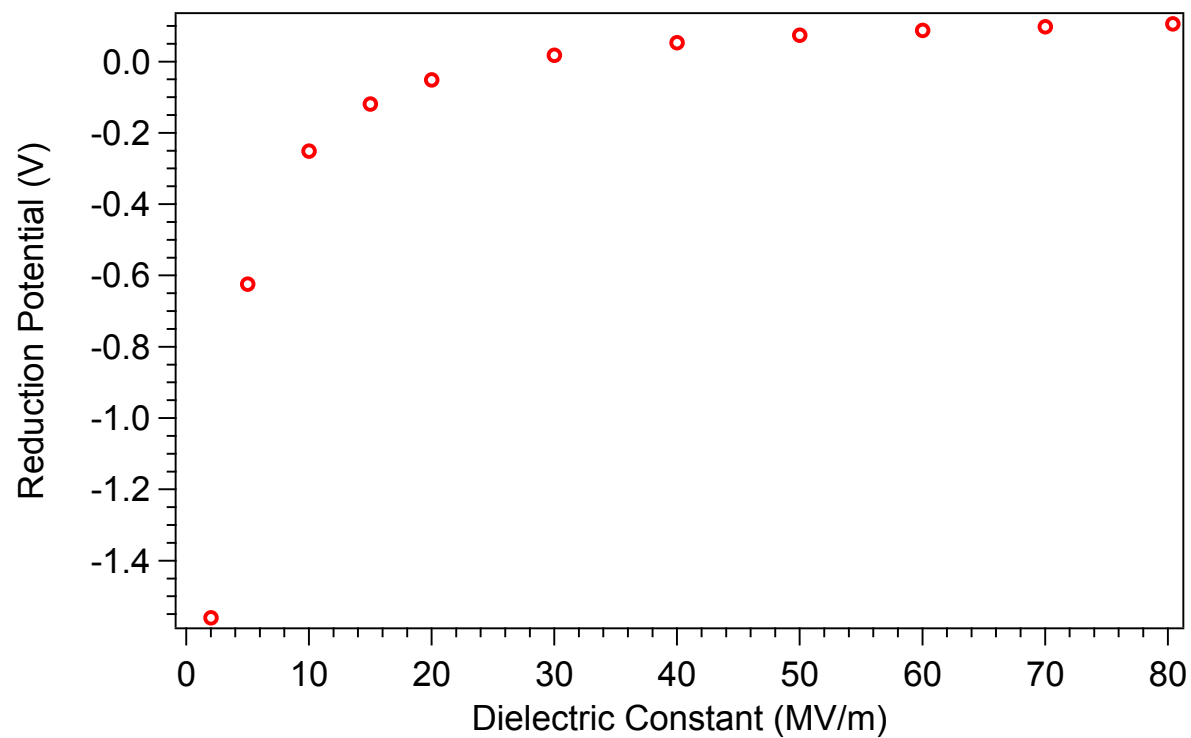

**Figure S11.** Calculated Ni<sup>III/II</sup> reduction potential for the full NiRd model as a function of dielectric constant within the COSMO solvation model.

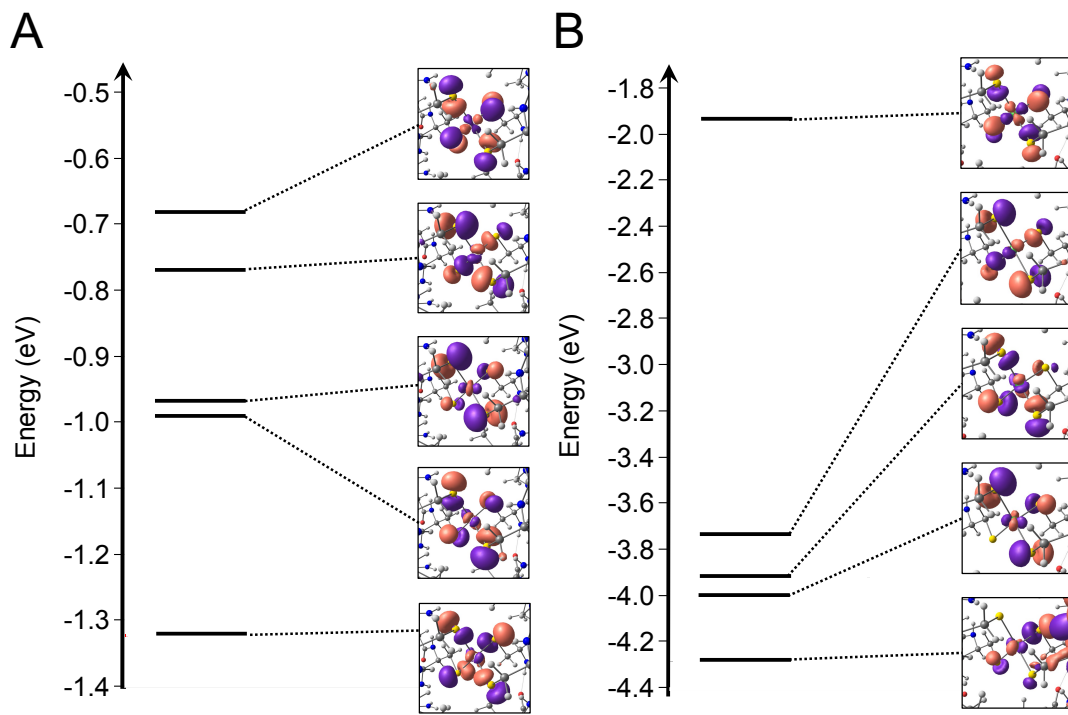

**Figure S12.** Semi-quantitative d-orbital splitting diagrams for (A) Ni<sup>II</sup>Rd (S=1) and (B) Ni<sup>III</sup>Rd (S=1/2). The purple and pink lobes represent phases of the orbitals.

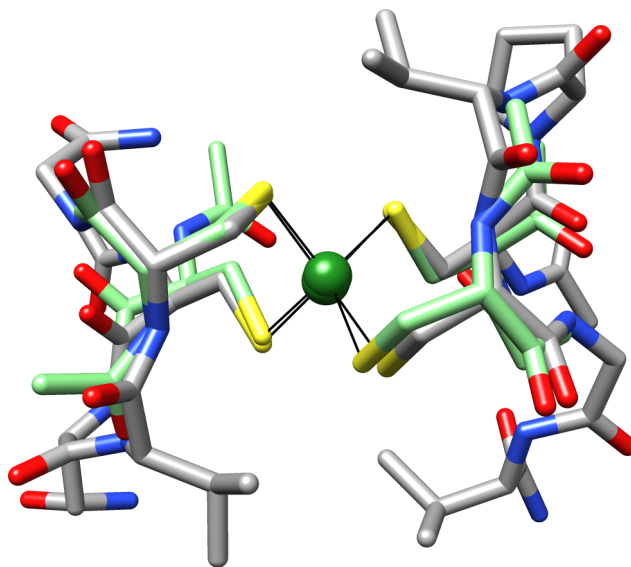

**Figure S13.** DFT-optimized geometries of the full Ni<sup>II</sup>Rd model (gray) overlaid with the [Ni<sup>II</sup>(NACA)<sub>4</sub>]<sup>2-</sup> model (green). Hydrogen atoms are omitted for clarity.

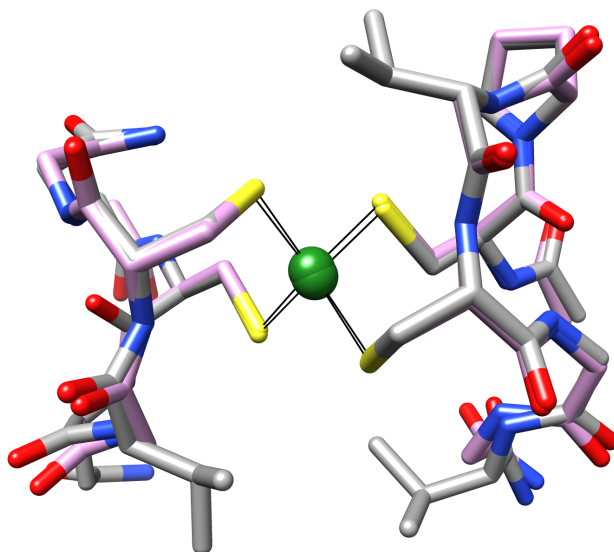

**Figure S14.** DFT-optimized geometries of the full Ni<sup>II</sup>Rd model (gray) overlaid with the backbone Ni<sup>II</sup>Rd model (pink). Hydrogen atoms are omitted for clarity.

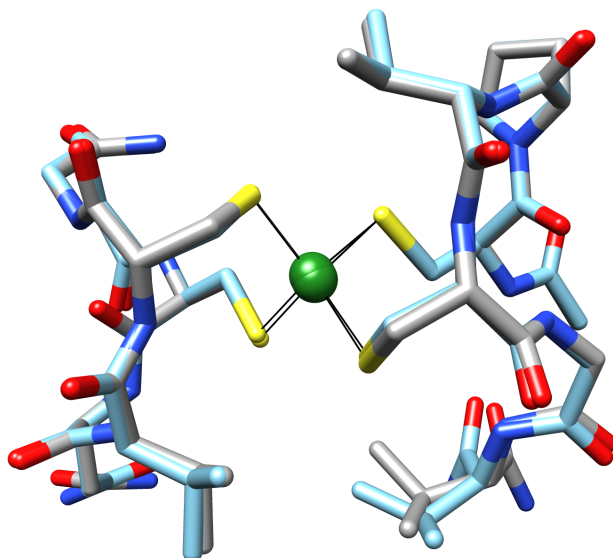

**Figure S15.** DFT-optimized geometries of the full Ni<sup>II</sup>Rd model (gray) overlaid with the full Ni<sup>III</sup>Rd model (blue). Hydrogen atoms are omitted for clarity.

**Table S2.** Calculated TD-DFT vertical transition energies ( $\text{cm}^{-1}$ ), oscillator strengths, and extinction coefficients of the full and backbone  $\text{Ni}^{\text{II}}\text{Rd}$  models for indicated states.

|          | State 5 |                  |                                                  | State 6 |                  |                                                  | State 7 |                  |                                                  | State 8 |                  |                                                  | State 10 |                  |                                                  | State 17 |                  |                                                  |
|----------|---------|------------------|--------------------------------------------------|---------|------------------|--------------------------------------------------|---------|------------------|--------------------------------------------------|---------|------------------|--------------------------------------------------|----------|------------------|--------------------------------------------------|----------|------------------|--------------------------------------------------|
|          | Energy  | $f_{\text{osc}}$ | $\epsilon$<br>( $\text{mM}^{-1}\text{cm}^{-1}$ ) | Energy   | $f_{\text{osc}}$ | $\epsilon$<br>( $\text{mM}^{-1}\text{cm}^{-1}$ ) | Energy   | $f_{\text{osc}}$ | $\epsilon$<br>( $\text{mM}^{-1}\text{cm}^{-1}$ ) |
| Full     | 13654   | 0.0073           | 0.636                                            | 15118   | 0.0008           | 0.070                                            | 21503   | 0.0058           | 0.505                                            | 22001   | 0.0211           | 1.831                                            | 23950    | 0.0065           | 0.462                                            | 28508    | 0.0538           | 4.669                                            |
| Backbone | 14181   | 0.0048           | 0.697                                            | 15193   | 0.0012           | 0.179                                            | 21776   | 0.0146           | 2.113                                            | 21981   | 0.0160           | 2.328                                            | 24428    | 0.0154           | 2.239                                            | 28336    | 0.0393           | 5.694                                            |



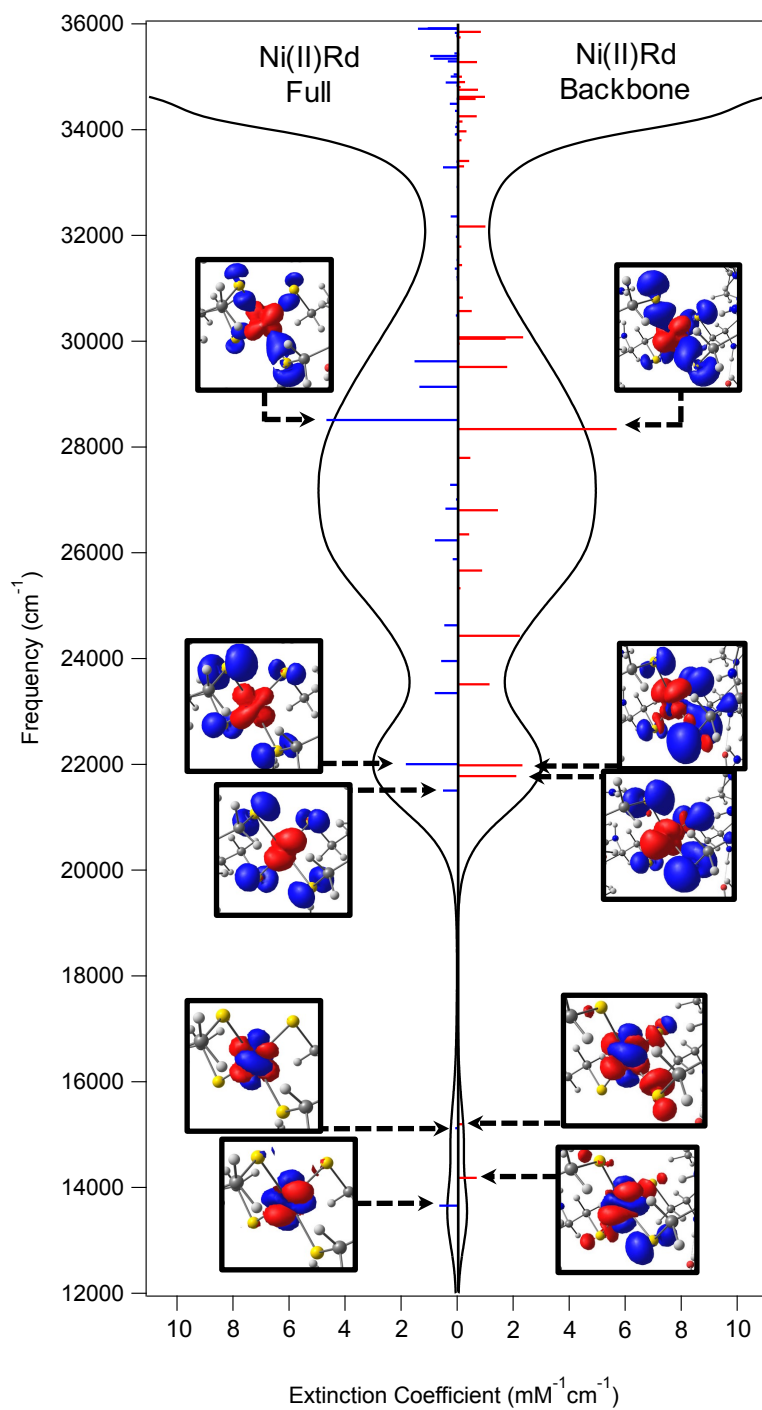

**Figure S16.** Vertically aligned calculated TD-DFT transitions for the full (*left*) and backbone (*right*) Ni<sup>II</sup>Rd models. (*Inset*) Electron difference density plots for indicated transitions; blue reflects negative difference density in the excited state while red reflects positive difference density.

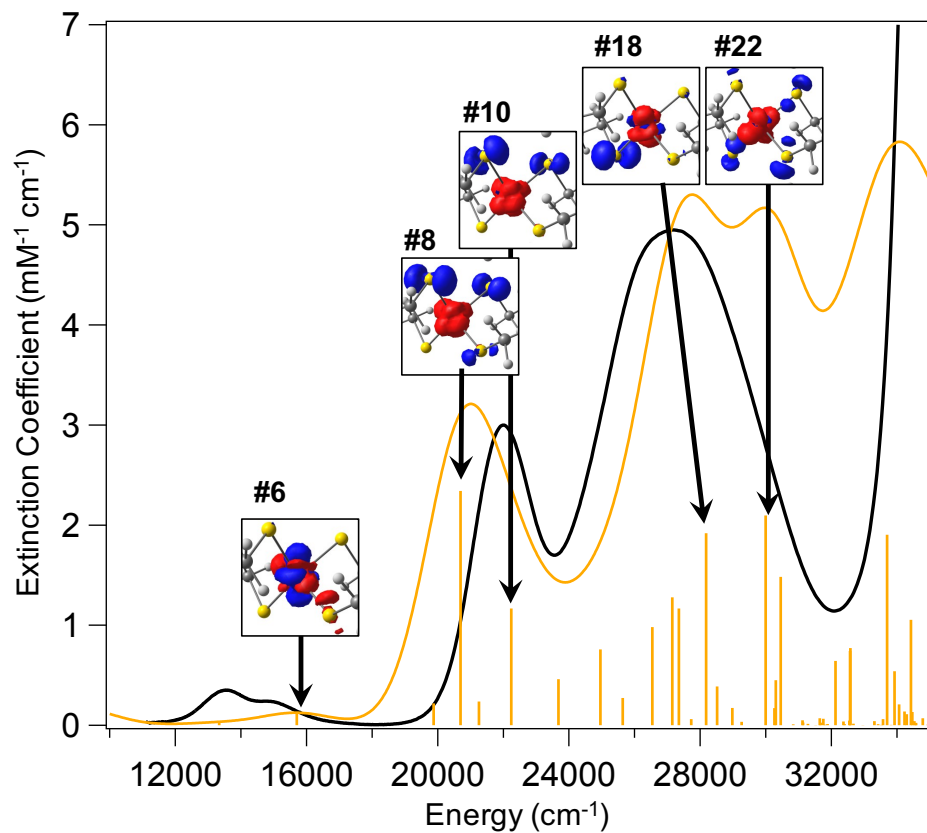

**Figure S17.** Optical absorption spectrum (black) of Ni<sup>II</sup>Rd overlaid with TD-DFT-calculated optical transitions for the *C<sub>p</sub>* Ni<sup>II</sup>Rd crystal structure geometry (orange). Electron difference densities shown for indicated transitions; blue reflects negative difference density in the excited state while red reflects positive difference density.

**Table S3.** Calculated frequencies for the Ni<sup>II</sup>Rd full model compared to experimental frequencies ( $\nu$ ), isotope shifts ( $\delta$ ), dimensionless displacements ( $\Delta$ s) for given excited states, and mode descriptions for select vibrational normal modes. Experimental vibrational frequencies were determined by fitting each band to a Gaussian lineshape.

| $\nu_{\text{calc, (H2O)}} (\text{cm}^{-1})$ | $\nu_{\text{expt, (H2O)}} (\text{cm}^{-1})$ | $\nu_{\text{calc, (D2O)}} (\text{cm}^{-1})$ | $\nu_{\text{expt, (D2O)}} (\text{cm}^{-1})$ | $\delta H_{\text{calc}} (\text{cm}^{-1})$ | $\delta H_{\text{expt}} (\text{cm}^{-1})$ | Dimensionless normal coordinate displacement ( $\Delta$ ) |           | Mode Description <sup>a</sup>                                                                       |
|---------------------------------------------|---------------------------------------------|---------------------------------------------|---------------------------------------------|-------------------------------------------|-------------------------------------------|-----------------------------------------------------------|-----------|-----------------------------------------------------------------------------------------------------|
|                                             |                                             |                                             |                                             |                                           |                                           | State 8                                                   | State 17  |                                                                                                     |
| 244.27                                      | 241.08                                      | 242.89                                      | 241.28                                      | -1.38                                     | 0.20                                      | 0.657927                                                  | 0.346208  | $\delta(\text{B}_1)$ S-Ni-S                                                                         |
| 277.08                                      | 282.08                                      | 275.66                                      | 281.34                                      | -1.42                                     | -0.74                                     | 0.382879                                                  | 1.187006  | $\nu(\text{A}_1)$ Ni-S                                                                              |
| 304.69                                      | 303.44                                      | 304.60                                      | 303.01                                      | -0.09                                     | -0.43                                     | 0.406295                                                  | 0.52849   | $\nu(\text{B}_2)$ Ni-S <sub>6</sub>                                                                 |
| 307.84                                      |                                             | 307.19                                      |                                             | -0.65                                     |                                           | 0.220485                                                  | 0.711182  | $\nu(\text{B}_2)$ Ni-S <sub>32</sub>                                                                |
| 335.73                                      | 333.91                                      | 336.23                                      | 332.71                                      | 0.50                                      | -1.20                                     | 0.344768                                                  | -0.013597 | $\nu(\text{B}_2)$ Ni-S                                                                              |
| 415.59                                      | 393.80                                      | 412.23                                      | 393.22                                      | -3.36                                     | -0.58                                     | 0.112537                                                  | -0.084804 | $\delta(\text{Ni-S}_6\text{-C})$                                                                    |
| 418.34                                      | 408.65                                      | 414.94                                      | 408.01                                      | -3.40                                     | -0.64                                     | -0.121766                                                 | 0.047518  | $\delta(\text{Ni-S}_{32}\text{-C})$                                                                 |
| 502.44                                      | -----                                       | 480.69                                      | -----                                       | -21.75                                    | -----                                     | -0.106749                                                 | -0.026013 | $\delta(\text{S}_9\text{-C-C})$                                                                     |
| 510.18                                      | -----                                       | 490.73                                      | -----                                       | -19.45                                    | -----                                     | 0.184249                                                  | 0.087303  | $\delta(\text{S}_{35}\text{-C-C})$                                                                  |
| 661.21                                      | 669.51                                      | 653.93                                      | -----                                       | -7.28                                     | -----                                     | -0.04008                                                  | -0.177381 | $\nu(\text{S}_{35}\text{-C})$                                                                       |
| 664.06                                      |                                             | 669.08                                      | -----                                       | 5.02                                      | -----                                     | -0.111204                                                 | -0.081166 | $\nu(\text{S}_9\text{-C})$                                                                          |
| 743.24                                      | 733.23                                      | 730.53                                      | 734.77                                      | -12.71                                    | 1.50                                      | 0.100964                                                  | 0.043519  | $w(\text{C}_9\text{-C-C})$                                                                          |
| 778.55                                      | 782.59                                      | 777.85                                      | 781.04                                      | -0.70                                     | -1.55                                     | -0.174294                                                 | -0.111595 | $\nu(\text{S}_6\text{-C})/w(\text{C}_9\text{-C-C})$                                                 |
| 854.72                                      | 844.05                                      | 834.21                                      | 841.00                                      | -20.51                                    | -3.05                                     | 0.095615                                                  | 0.051679  | $w(\text{C-C-C})$                                                                                   |
| 862.89                                      |                                             | 856.73                                      |                                             | -6.16                                     |                                           | 0.074731                                                  | 0.034492  | $w(\text{C}_{32}\text{-C-C})/ w(\text{C}_{35}\text{-C-C})$                                          |
| 867.97                                      |                                             | 867.98                                      |                                             | 0.01                                      |                                           | -0.043387                                                 | -0.060528 | $w(\text{C}_{32}\text{-C-C})/ w(\text{C}_{35}\text{-C-C})$                                          |
| 925.96                                      | 905.53                                      | 912.73                                      | 903.92                                      | -13.23                                    | -1.61                                     | 0.096089                                                  | 0.061618  | $\delta(\text{C}_9\text{-C-C})/ \delta(\text{C}_{32}\text{-C-C})$                                   |
| 927.61                                      |                                             | 925.45                                      |                                             | -2.16                                     |                                           | -0.044238                                                 | -0.086644 | $\delta(\text{C}_9\text{-C-C})/ \delta(\text{C}_{32}\text{-C-C})/ \delta(\text{C}_{35}\text{-C-C})$ |
| 1010.92                                     | 1000.43                                     | 998.24                                      | 1002.51                                     | -12.68                                    | 2.08                                      | 0.078009                                                  | 0.02264   | $\nu(\text{C}_{35}\text{-C})$                                                                       |
| 1018.97                                     |                                             | 1004.98                                     |                                             | -13.99                                    |                                           | -0.059868                                                 | -0.002294 | $\nu(\text{C}_9\text{-C})$                                                                          |
| 1115.15                                     | 1087.24                                     | 1121.15                                     | 1088.26                                     | 6.00                                      | 1.02                                      | 0.050302                                                  | 0.015891  | $t(\text{H-C}_9\text{-H})$                                                                          |
| 1119.03                                     |                                             | 1123.69                                     |                                             | 4.66                                      |                                           | 0.101217                                                  | 0.050511  | $t(\text{H-C}_{35}\text{-H})$                                                                       |
| 1153.50                                     | 1143.01                                     | 1144.85                                     | 1144.34                                     | -8.65                                     | 1.33                                      | 0.036976                                                  | 0.004609  | $\delta(\text{C}_9\text{-C-N})/ \nu(\text{C}_9\text{-N})$                                           |
| 1156.77                                     |                                             | 1160.80                                     |                                             | 4.03                                      |                                           | -0.025669                                                 | -0.030537 | $\delta(\text{C}_{32}\text{-C-N})/ \nu(\text{C}_{32}\text{-N})$                                     |
| 1168.45                                     | 1153.16                                     | 1186.44                                     | 1157.86                                     | 17.99                                     | 4.70                                      | -0.044422                                                 | 0.010294  | $t(\text{H-C}_{32}\text{-H})/ \nu(\text{C}_{32}\text{-C})$                                          |
| 1175.71                                     |                                             | 1195.58                                     |                                             | 19.87                                     |                                           | -0.037956                                                 | 0.033807  | $t(\text{H-C}_6\text{-H})/ \nu(\text{C}_6\text{-C})$                                                |
| 1218.57                                     | 1207.00                                     | 1226.57                                     | -----                                       | 8.00                                      | -----                                     | -0.021567                                                 | 0.02374   | $t(\text{H-C}_9\text{-H})/ t(\text{H-C}_{35}\text{-H})$                                             |

|         |         |         |         |       |       |           |           |                                                 |
|---------|---------|---------|---------|-------|-------|-----------|-----------|-------------------------------------------------|
| 1224.49 |         | 1232.05 | -----   | 7.56  | ----- | -0.044225 | 0.026554  | t(H-C <sub>9</sub> -H)/ t(H-C <sub>35</sub> -H) |
| 1246.17 | 1225.50 | 1248.04 | 1226.22 | 1.87  | 0.72  | -0.057262 | -0.033833 | t(H-C <sub>9</sub> -H)/v(C <sub>9</sub> -C)     |
| 1251.14 |         | 1255.01 |         | 3.87  |       | 0.101394  | 0.024829  | t(H-C <sub>35</sub> -H)/ v(C <sub>35</sub> -C)  |
| 1311.37 | 1274.68 | 1322.87 | 1276.02 | 11.50 | 1.34  | -0.01502  | 0.010169  | w(H-C-H)/ δ(S <sub>32</sub> -C-C)               |
| 1317.99 | 1284.70 | 1312.08 | 1288.91 | -5.91 | 4.21  | -0.003162 | 0.010968  | w(H-C <sub>9</sub> -H)/ δ(S <sub>9</sub> -C-C)  |
| 1361.71 | 1350.95 | 1360.61 | 1343.55 | -1.10 | -7.40 | -0.024922 | -0.017432 | r(H-C <sub>9</sub> -H)/ δ(C <sub>9</sub> -C-C)  |
| 1443.34 | 1415.74 | 1441.55 | 1414.93 | -1.79 | -0.81 | 0.051485  | -0.00585  | δ(H-C <sub>9</sub> -H)                          |
| 1447.29 | 1434.58 | 1442.93 | 1429.66 | -4.36 | -4.92 | 0.045848  | 0.000048  | δ(H-C <sub>35</sub> -H)                         |

<sup>a</sup>Mode description utilizes the following symbols: v = stretch, δ = bend, w = wag, t = twist, r = rock



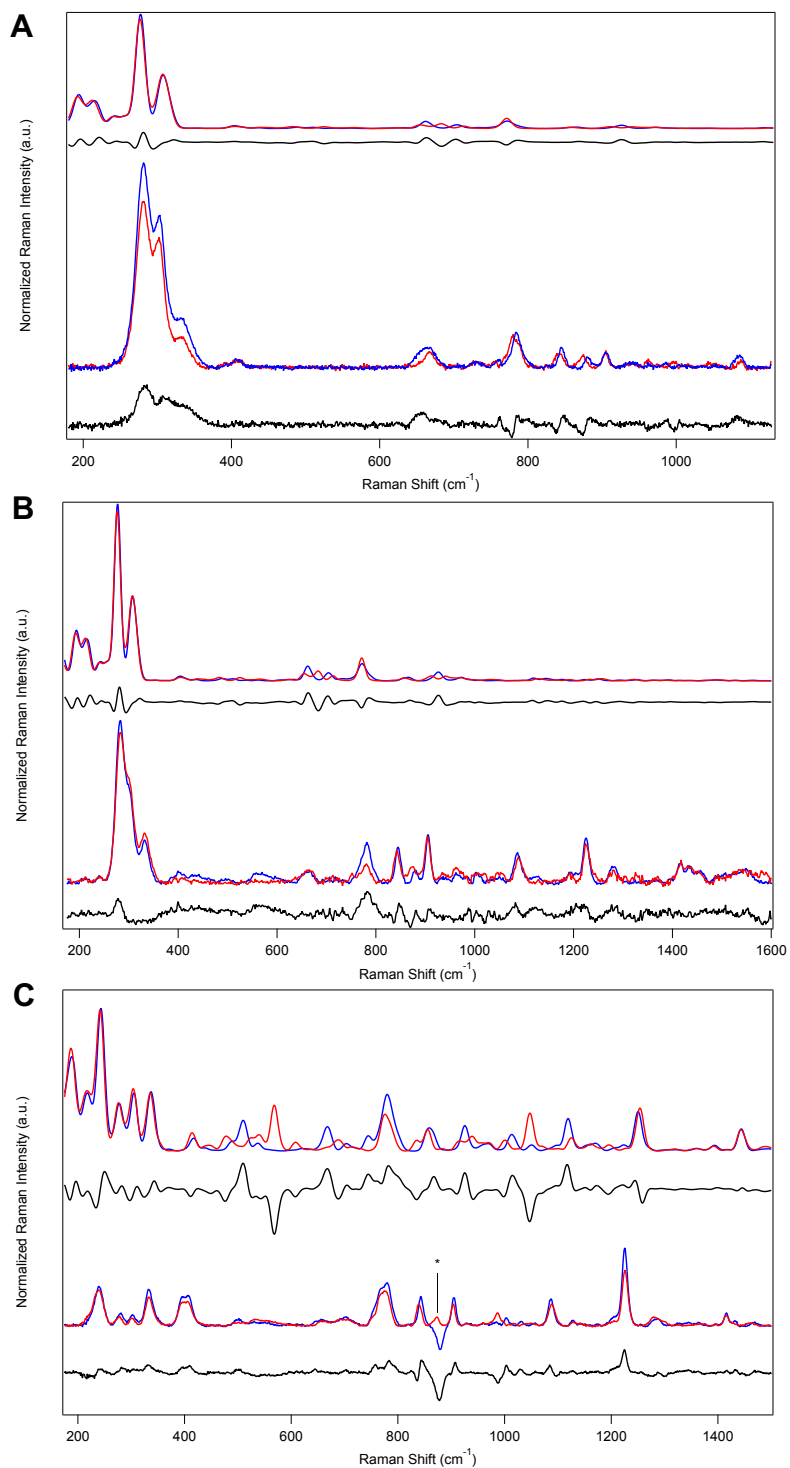

**Figure S19.** Calculated (*top*) and experimental (*bottom*) resonance Raman spectra of NiRd with (A) 364 nm, (B) 407 nm, and (C) 488 nm excitation in buffered  $\text{H}_2\text{O}$  (blue),  $\text{D}_2\text{O}$  (red), and the corresponding difference spectrum (H - D, black).

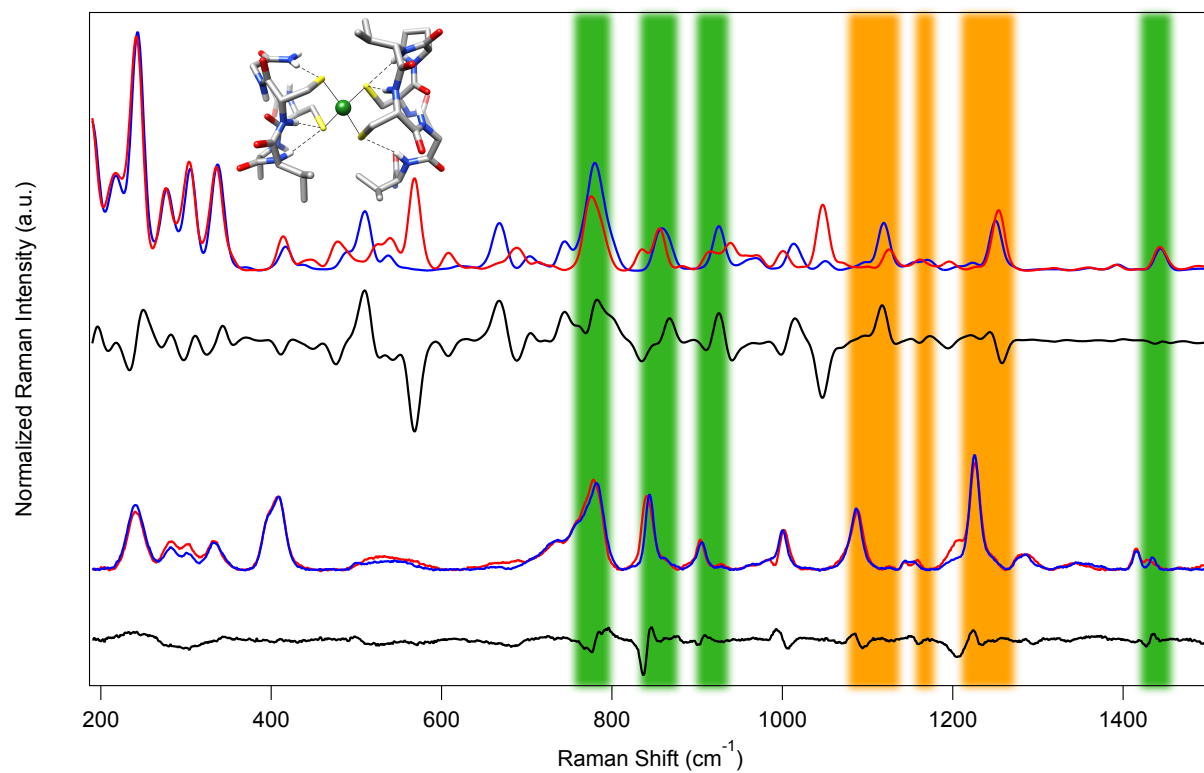

**Figure S20.** Calculated (*top*) and experimental (*bottom*) resonance Raman spectra of NiRd in buffered H<sub>2</sub>O (blue) and D<sub>2</sub>O (red). The frequency shifts resulting from exchangeable protons are highlighted; green reflects bands that are downshifted in D<sub>2</sub>O, while orange reflects bands that are upshifted in D<sub>2</sub>O. (*Inset*) Structure of the active site shown with hydrogen bonding network to cysteine thiolates shown with dotted lines.

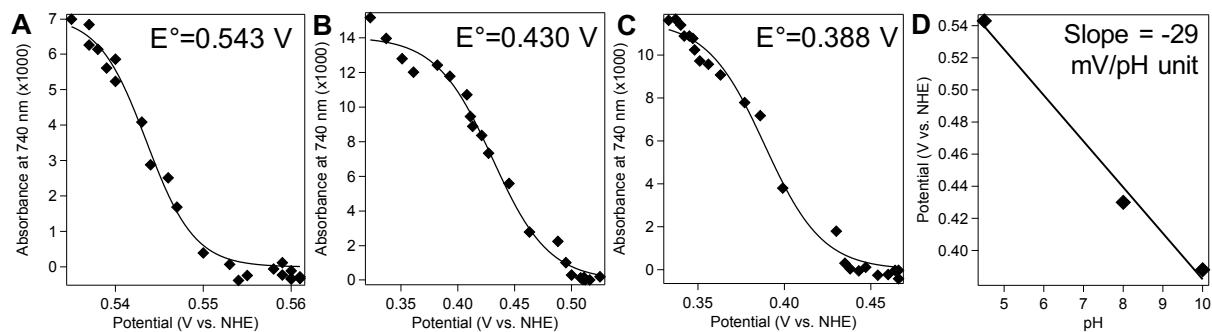

**Figure S21.** Potentiometric titrations of Ni<sup>II</sup>Rd with [Fe<sup>III</sup>(CN)<sub>6</sub>]<sup>3-</sup>. Absorbance of NiRd at 740 nm is plotted as a function of measured solution potential in (A) 50 mM acetate, pH 4.5, (B) 50 mM Tris, pH 8.0, and (C) 50 mM CAPS, pH 10.0. (D) Midpoint potential as a function of pH.



**Table S4.** Calculated electronic and Gibbs free energies in Hartree ( $E_h$ ) of  $[\text{FeCp}_2]^+$  and  $[\text{FeCp}_2]^0$ .

|                     | <i>Electronic Energy</i> |                     | <i>Gibbs Free Energy</i> |
|---------------------|--------------------------|---------------------|--------------------------|
|                     | <b>Gas-phase</b>         | <b>Acetonitrile</b> | <b>Gas-phase</b>         |
| $[\text{FeCp}_2]^0$ | -1665.00426911206        | -1665.01262017523   | -1664.86700109000        |
| $[\text{FeCp}_2]^+$ | -1664.75006883420        | -1664.82812574107   | -1664.61338495000        |

**Table S5.** Calculated electronic and Gibbs free energies in Hartree ( $E_h$ ) of Ni<sup>II</sup>Rd and Ni<sup>III</sup>Rd.

|                               | <i>Electronic Energy</i> |                                        | <i>Gibbs Free Energy</i> |
|-------------------------------|--------------------------|----------------------------------------|--------------------------|
|                               | <b>Gas-phase</b>         | <b>Solution-phase (H<sub>2</sub>O)</b> | <b>Gas-phase</b>         |
| Ni <sup>II</sup> Rd Full      | -6666.36123525000        | -6666.60363685797                      | -6665.24801193000        |
| Ni <sup>III</sup> Rd Full     | -6666.30624265000        | -6666.44587436237                      | -6665.18956692000        |
| Ni <sup>II</sup> Rd Backbone  | -6104.75796383368        | -6104.99512369138                      | -6103.93749045000        |
| Ni <sup>III</sup> Rd Backbone | -6104.70334293496        | -6104.82889349978                      | -6103.88235120000        |

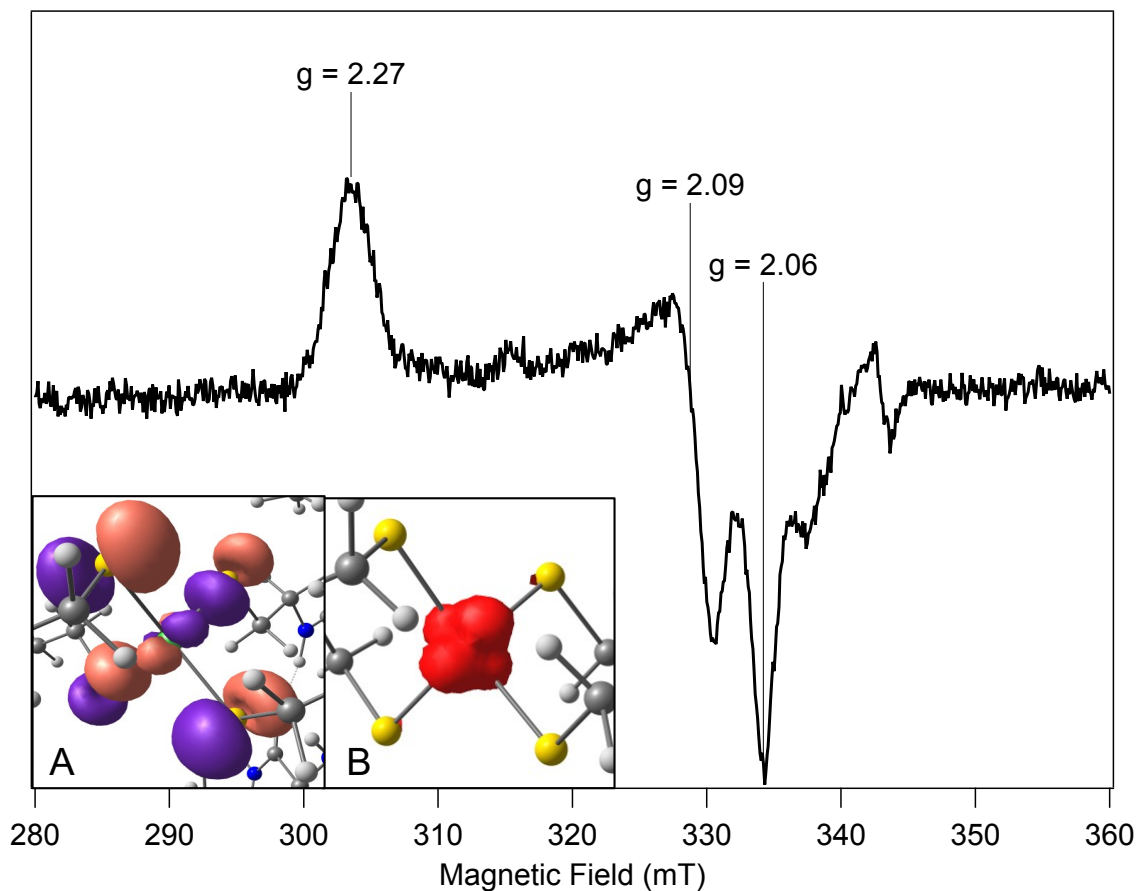

**Figure S22.** X-Band EPR spectrum of 400  $\mu\text{M}$  NiRd and 800  $\mu\text{M}$  potassium ferricyanide recorded at 10 K.  $P_{\mu\text{w}} = 2.0$  mW; Mod. Amp. = 1 mT;  $\nu = 9.6240$  GHz. (Inset) (A) SOMO and (B) spin density for  $\text{Ni}^{\text{III}}\text{Rd}$ . Purple and pink lobes represent phasing in (A) while positive spin density in (B) is shown in red and negative spin density is shown in blue. The contour value is  $\pm 0.011$  au. From a Mulliken spin population analysis, 97% of the spin is localized on the nickel center.

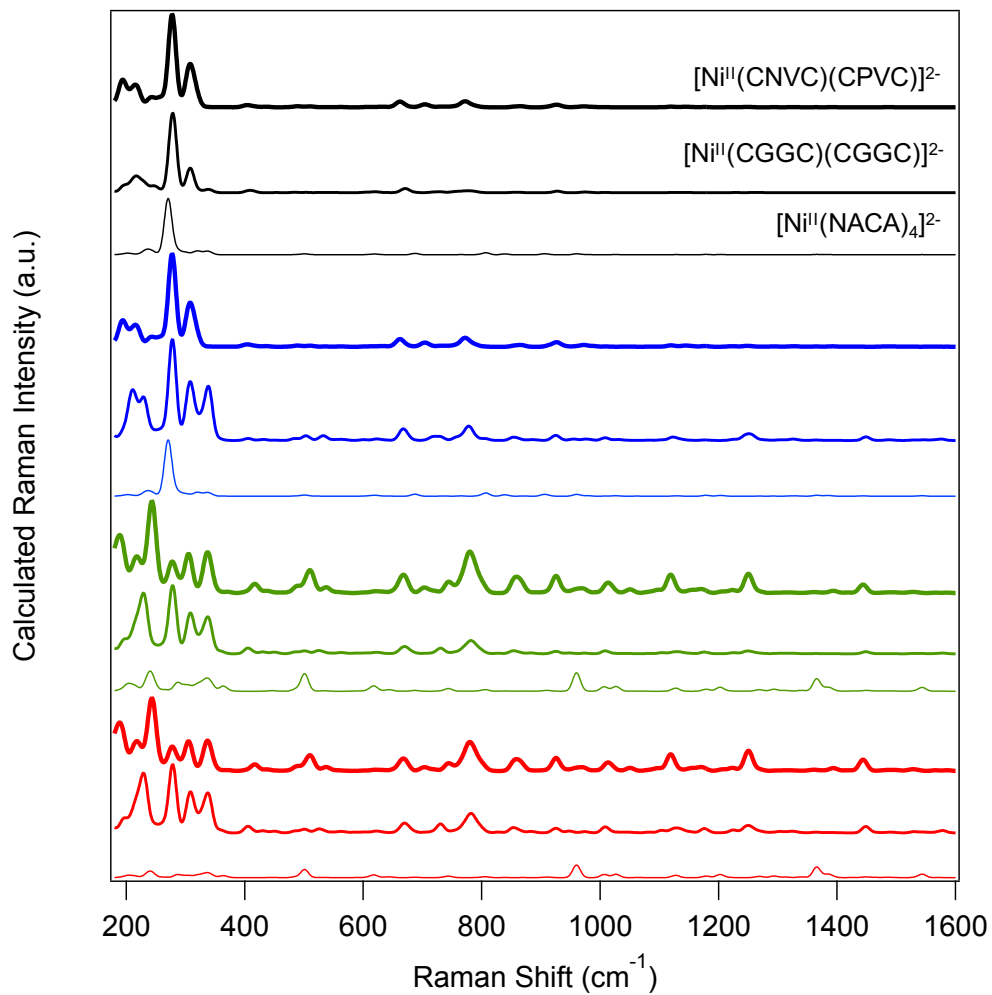

**Figure S23.** Calculated resonance Raman spectra of the full (thick traces, top lines), backbone (medium-thickness traces, middle lines), and (NACA)<sub>4</sub>-only (thin traces, bottom lines) Ni<sup>II</sup>Rd models at 364 nm (black), 407 nm (blue), 458 nm (green) and 488 nm (red).

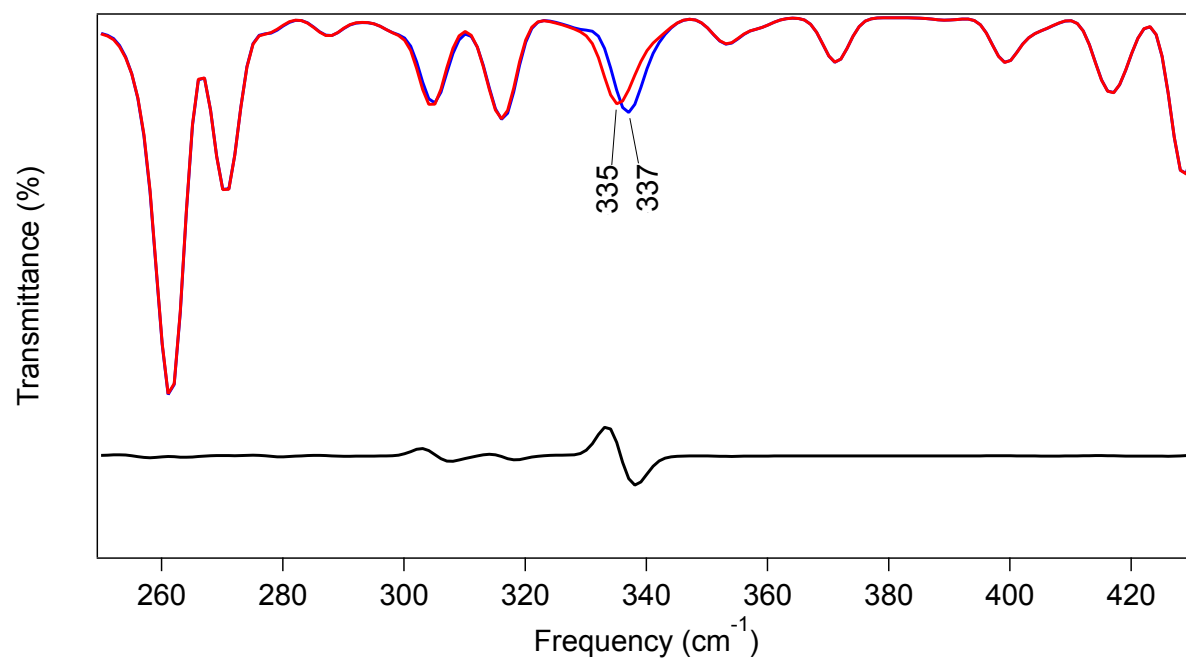

**Figure S24.** Calculated IR spectra in transmission mode of the full Ni<sup>II</sup>Rd model with <sup>58</sup>Ni (blue) and <sup>60</sup>Ni (red). Difference spectrum (<sup>58</sup>Ni - <sup>60</sup>Ni) is shown in black.

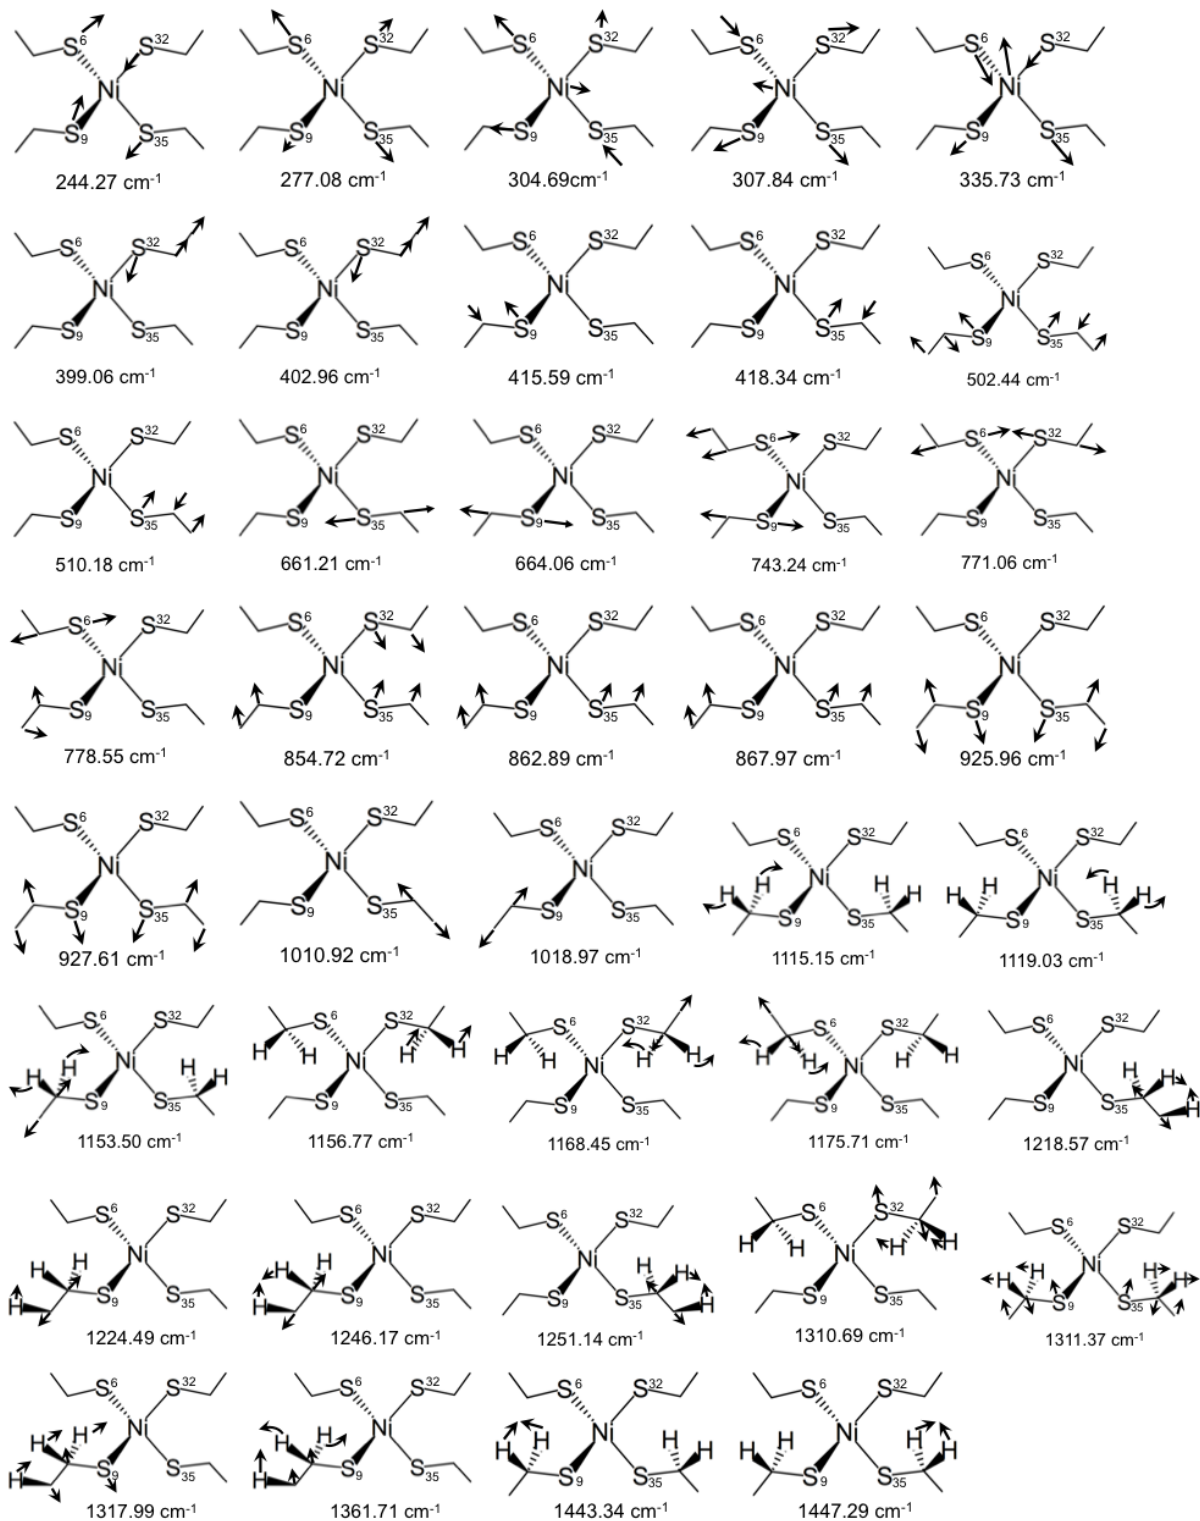

**Figure S25.** Normal mode vector displacements of the full Ni<sup>II</sup>Rd model.

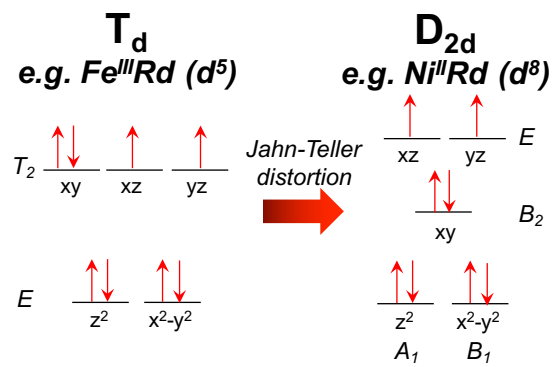

**Figure S26.** Idealized d-orbital splitting diagram for a  $T_d$   $d^5$  system that undergoes Jahn—Teller distortion to a  $D_{2d}$  geometry.

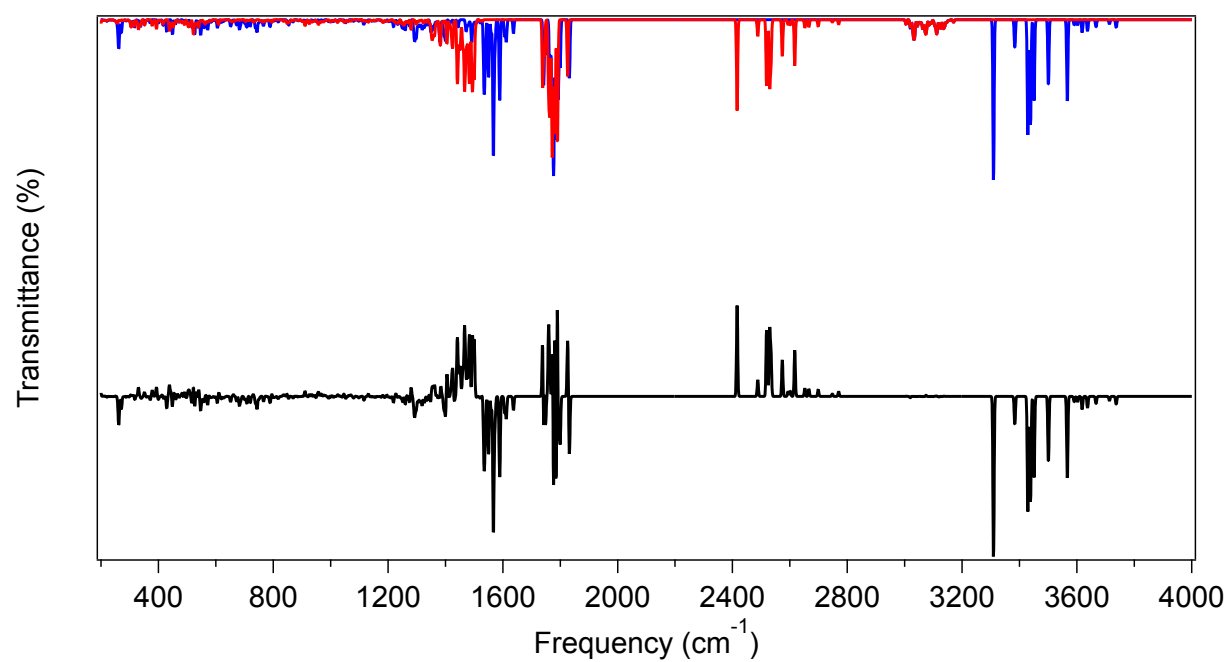

**Figure S27.** Calculated IR spectra in transmission mode of the full Ni<sup>II</sup>Rd model in H<sub>2</sub>O (blue) and with exchangeable protons replaced with deuterons (red). Difference spectrum (H-D) is shown in black.



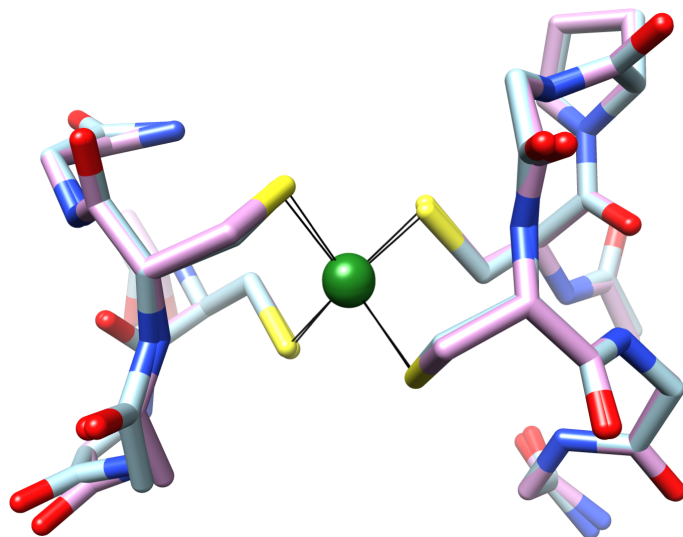

**Figure S28.** DFT-optimized geometries of backbone Ni<sup>II</sup>Rd model (pink) and backbone Ni<sup>III</sup>Rd model (light blue). Hydrogen atoms are omitted for clarity.

## Sample input file for geometry optimization and vibrational frequency calculation

```
# calculation parameters
! UKS B3LYP RIJCOSX TightSCF TightOpt Grid4 NoFinalGrid UCO D3 NormalPrint
! def2-SVP def2-SVP/J PrintBasis DecontractAux ZORA NumFreq

#parallel
%pal
nprocs 12
end

%scf
maxiter 500
AutoStart true
end

# VibFreq Parameters
%freq CentralDiff True
Increment 0.01
end

#increased basis on Ni and S
%basis
NewGTO S "ZORA-def2-TZVPP" end
NewGTO Ni "ZORA-def2-TZVPP" end
end

%geom Constraints
{ C 0 C } #VAL 5 CA
{ C 7 C } #CYS 6 CA
{ C 17 C } #ASN 7 CA
{ C 42 C } #CYS 9 CA
{ C 52 C } #GLY 10 CA
{ C 68 C } #CYS 32 CA
{ C 78 C } #PRO 33 CA
{ C 100 C } #CYS 34 CA
{ C 110 C } #GLY 35 CA
{ C 117 C } #VAL 36 CA
end
end
* xyz #charge# -2 #spin# 3
(input atom coordinates)
*
```

## Sample input file for TD-DFT calculation

```
# calculation parameters
! UKS B3LYP RIJCOSX TightSCF Grid4 NoFinalGrid UCO D3 NormalPrint
! def2-SVP def2-SVP/J PrintBasis DecontractAux ZORA

#parallel
%pal
nprocs 8
end

%scf
maxiter 500
AutoStart true
end

%maxcore 1000

%tddft
NRoots 60
MaxDim 400
TDA true
end

#increased basis on Ni and S
%basis
  NewGTO S "ZORA-def2-TZVPP" end
  NewGTO Ni "ZORA-def2-TZVPP" end
end

* xyz #charge# -2 #spin# 3
(input atom coordinates)
*
```

## Sample input file for ORCA ASA

```
# calculation parameters
! UKS B3LYP RIJCOSX TightSCF Grid4 NoFinalGrid UCO D3 NormalPrint
! def2-SVP def2-SVP/J PrintBasis DecontractAux ZORA NMGrad

#parallel
%pal
nprocs 8
end

%scf
maxiter 500
AutoStart true
end

%maxcore 1000

%tddft
NRoots 60
MaxDim 400
TDA true
end

#increased basis on Ni and S
%basis
  NewGTO S "ZORA-def2-TZVPP" end
  NewGTO Ni "ZORA-def2-TZVPP" end
end

# this is ASA specific input
%rr states 5,6,7,8,9,10,17
  HessName "/...../NiRD_CXXC_Backbone_B3LYP_VibFreq.hess"
  ASAInput true
end

* xyz #charge# -2 #spin# 3
(input atom coordinates)
*
```

### Sample input file for single-point energy calculation with solvation

```
! UKS B3LYP RIJCOSX TightSCF Grid4 NoFinalGrid UCO D3 NormalPrint  
! def2-SVP def2-SVP/J PrintBasis DecontractAux ZORA COSMO(water)
```

```
#parallel  
%pal  
nprocs 12  
end
```

```
%scf  
maxiter 500  
AutoStart true  
end
```

```
#increased basis on Ni and S  
%basis  
  NewGTO S "ZORA-def2-TZVPP" end  
  NewGTO Ni "ZORA-def2-TZVPP" end  
end
```

```
* xyz #charge# -2 #spin# 3  
(input atom coordinates)  
*
```

## Sample input file for EPR g-tensor calculation with solvation

```
! UKS B3LYP RIJCOSX TightSCF Grid4 NoFinalGrid UCO D3 NormalPrint  
! def2-SVP def2-SVP/J PrintBasis DecontractAux ZORA COSMO(water)
```

```
#parallel  
%pal  
nprocs 8  
end
```

```
%scf  
maxiter 500  
AutoStart true  
end
```

```
%basis  
NewGTO S "ZORA-def2-TZVPP" end  
NewGTO Ni "ZORA-def2-TZVPP" end  
end
```

```
%rel SOCType 3  
SOCFlags 1,3,3,1  
end
```

```
%epnmr gTensor 1 # do the g-tensor  
Ori -3 # choice of origin  
ewin -1000,1000  
end
```

```
%geom Constraints  
{ C 7 C } #CYS 6 CA  
{ C 17 C } #ASN 7 CA  
{ C 42 C } #CYS 9 CA  
{ C 52 C } #GLY 10 CA  
{ C 68 C } #CYS 39 CA  
{ C 78 C } #PRO 40 CA  
{ C 100 C } #CYS 42 CA  
{ C 110 C } #GLY 43 CA  
{ C 117 C } #VAL 44 CA  
end  
end
```

```
* xyz #charge# -1 #spin# 2  
(input atom coordinates)  
*
```

### Cartesian coordinates of the DFT geometry-optimized full Ni<sup>II</sup>Rd model in the gas phase

|   |              |              |              |
|---|--------------|--------------|--------------|
| C | 9.082758442  | 14.082091579 | 11.877862784 |
| C | 10.564923618 | 14.272741536 | 11.593099467 |
| O | 11.420741386 | 13.462882037 | 11.927812841 |
| H | 8.972954698  | 13.357106735 | 12.689112527 |
| H | 8.582982076  | 13.682690848 | 10.984542552 |
| H | 8.601348922  | 15.032299175 | 12.143118977 |
| N | 10.869941052 | 15.409712213 | 10.902838389 |
| C | 12.258000007 | 15.820000000 | 10.730999998 |
| C | 12.813026571 | 16.201722025 | 12.116856683 |
| O | 12.277557753 | 17.062981703 | 12.803302120 |
| C | 12.332845230 | 17.029212335 | 9.796452294  |
| S | 14.018443269 | 17.707352252 | 9.615374778  |
| H | 10.175372391 | 16.146064168 | 10.873000254 |
| H | 12.826683542 | 14.978171120 | 10.318872225 |
| H | 11.942359831 | 16.745486117 | 8.811817503  |
| H | 11.683190216 | 17.811390089 | 10.197005961 |
| N | 13.934173893 | 15.547955190 | 12.519363124 |
| C | 14.534999997 | 15.772000005 | 13.826999993 |
| C | 14.952657832 | 17.238244505 | 14.070523820 |
| O | 15.162528533 | 17.602524152 | 15.217970856 |
| C | 15.823339450 | 14.937834887 | 13.967813523 |
| H | 14.166244708 | 14.700153413 | 12.020888768 |
| H | 13.834504018 | 15.511156104 | 14.630746005 |
| H | 16.202633741 | 15.094717465 | 14.981680542 |
| H | 16.567192926 | 15.319344459 | 13.255235980 |
| N | 15.194151413 | 17.977978986 | 12.962034180 |
| C | 15.696898008 | 19.338404745 | 13.032112230 |
| C | 14.595968876 | 20.408572215 | 13.091205926 |
| O | 14.669329807 | 21.309237002 | 13.916377766 |
| C | 16.696273572 | 19.582051403 | 11.872520471 |
| C | 16.987840610 | 21.067031830 | 11.644393876 |
| C | 17.985483932 | 18.797779070 | 12.144521438 |
| H | 14.897821146 | 17.641033714 | 12.044439131 |
| H | 16.207098390 | 19.444777515 | 13.995450926 |
| H | 16.232145883 | 19.198222803 | 10.951935742 |
| H | 17.770706454 | 17.753398882 | 12.405684786 |
| H | 18.535710622 | 19.246110556 | 12.984709887 |
| H | 18.642242136 | 18.804818641 | 11.265806432 |

|   |              |              |              |
|---|--------------|--------------|--------------|
| H | 16.096097993 | 21.594024429 | 11.291167531 |
| H | 17.333195336 | 21.553828339 | 12.566827923 |
| H | 17.753898446 | 21.184689433 | 10.868603776 |
| N | 13.601173101 | 20.322903092 | 12.164449434 |
| C | 12.611788998 | 21.374888991 | 12.067283001 |
| C | 11.202607789 | 20.987528158 | 12.557620766 |
| O | 10.321980941 | 21.836084231 | 12.629003213 |
| C | 12.461841086 | 21.922101567 | 10.642517850 |
| S | 11.704092204 | 20.738843208 | 9.467825074  |
| H | 13.641403126 | 19.615022692 | 11.427911848 |
| H | 12.949730736 | 22.178717990 | 12.731540188 |
| H | 13.442566621 | 22.243475955 | 10.274958215 |
| H | 11.806583302 | 22.797479967 | 10.693297988 |
| N | 10.995992104 | 19.673214360 | 12.830721053 |
| C | 9.686440000  | 19.148175000 | 13.115364002 |
| C | 9.039918109  | 18.353506846 | 11.975341918 |
| O | 8.233800240  | 17.454925223 | 12.210528585 |
| H | 11.757781638 | 19.004265367 | 12.766718515 |
| H | 9.704726508  | 18.476107089 | 13.981077097 |
| H | 9.028946085  | 19.997679302 | 13.342844775 |
| N | 9.389805952  | 18.728701689 | 10.726916594 |
| H | 10.086449761 | 19.453498255 | 10.511749211 |
| H | 8.932803628  | 18.271086458 | 9.950550568  |
| C | 15.430688612 | 16.156865096 | 1.650058160  |
| C | 14.204972334 | 16.836151989 | 2.243517423  |
| O | 13.147341597 | 16.944359732 | 1.624797026  |
| H | 15.102002921 | 15.427801123 | 0.903025380  |
| H | 16.050611919 | 16.915160113 | 1.152739667  |
| H | 16.044136056 | 15.684177230 | 2.424331090  |
| N | 14.374639430 | 17.336321684 | 3.487049954  |
| C | 13.294751997 | 18.058448012 | 4.133252008  |
| C | 12.958458690 | 19.323519971 | 3.333165643  |
| O | 13.840160874 | 20.123755783 | 3.019273228  |
| C | 13.716013260 | 18.433229774 | 5.557488135  |
| S | 12.375267676 | 19.258445548 | 6.482022487  |
| H | 15.258443311 | 17.208642700 | 3.978015185  |
| H | 12.416827806 | 17.405940979 | 4.180606668  |
| H | 14.024121363 | 17.525214339 | 6.089021065  |
| H | 14.589574969 | 19.090124506 | 5.506659280  |
| N | 11.658120862 | 19.564339390 | 3.041782641  |



|   |              |              |             |
|---|--------------|--------------|-------------|
| C | 11.289606998 | 20.767459995 | 2.298923992 |
| C | 11.209188253 | 22.042731734 | 3.152775250 |
| O | 10.935049417 | 23.106285450 | 2.609692038 |
| C | 9.933092688  | 20.401032710 | 1.675938026 |
| C | 9.329799672  | 19.440154523 | 2.709647629 |
| C | 10.538185184 | 18.625031105 | 3.191933079 |
| H | 12.053226379 | 20.980903818 | 1.542455016 |
| H | 9.332762941  | 21.295429621 | 1.482443655 |
| H | 10.097974444 | 19.878668259 | 0.723911835 |
| H | 8.908298851  | 20.012484453 | 3.546538022 |
| H | 8.536889596  | 18.801411382 | 2.302090212 |
| H | 10.723185348 | 17.744450715 | 2.560915962 |
| H | 10.432740540 | 18.302146637 | 4.233713987 |
| N | 11.440259855 | 21.883271694 | 4.472007591 |
| C | 11.455022265 | 22.998677629 | 5.396576544 |
| C | 12.893085582 | 23.436318618 | 5.732828467 |
| O | 13.199441221 | 24.621517425 | 5.735417989 |
| C | 10.645453087 | 22.672511591 | 6.672665831 |
| H | 11.663749049 | 20.960332527 | 4.849609395 |
| H | 11.016247822 | 23.854114734 | 4.871615583 |
| H | 11.180006126 | 21.890621463 | 7.225276785 |
| N | 13.768537599 | 22.429868713 | 6.033830383 |
| C | 15.119002023 | 22.733983966 | 6.460206976 |
| C | 16.235262827 | 22.220191357 | 5.547134891 |
| O | 17.394488331 | 22.575747827 | 5.725586527 |
| C | 15.418819054 | 22.270995504 | 7.898854300 |
| S | 15.604921002 | 20.461088505 | 8.135425419 |
| H | 13.402957936 | 21.486500159 | 6.193127963 |
| H | 15.194373374 | 23.828365561 | 6.428689942 |
| H | 16.369170432 | 22.726708728 | 8.195485340 |
| H | 14.632007766 | 22.658428050 | 8.554505295 |
| N | 15.879419947 | 21.328034887 | 4.588989619 |
| C | 16.839087981 | 20.821394025 | 3.646533026 |
| C | 17.690049385 | 19.641764567 | 4.079666835 |
| O | 18.491487749 | 19.146056283 | 3.286836031 |
| H | 14.904197397 | 21.140454113 | 4.377134754 |
| H | 16.294454134 | 20.495224730 | 2.754819084 |
| H | 17.548696715 | 21.608496634 | 3.358344324 |
| N | 17.541908159 | 19.153754739 | 5.333222088 |
| C | 18.412744369 | 18.058793261 | 5.687154648 |

|    |              |              |              |
|----|--------------|--------------|--------------|
| C  | 18.085125894 | 16.839873078 | 4.813647351  |
| O  | 16.944675469 | 16.486328704 | 4.550248275  |
| C  | 18.411619815 | 17.705127341 | 7.189878980  |
| C  | 18.921794582 | 18.900952727 | 8.008532020  |
| C  | 17.066519812 | 17.179746517 | 7.698491046  |
| H  | 16.910339585 | 19.584216731 | 6.012332979  |
| H  | 19.440035268 | 18.359337216 | 5.427737830  |
| H  | 19.149315417 | 16.890812180 | 7.281825722  |
| H  | 16.719920571 | 16.316112510 | 7.121269315  |
| H  | 16.283715036 | 17.941743399 | 7.648435602  |
| H  | 17.145358568 | 16.879451959 | 8.750521038  |
| H  | 19.857290270 | 19.300938161 | 7.592568627  |
| H  | 18.180634710 | 19.708864945 | 8.032974578  |
| H  | 19.110779548 | 18.593854239 | 9.044878715  |
| N  | 19.172176569 | 16.110591786 | 4.425438444  |
| H  | 20.053034650 | 16.595538099 | 4.333870458  |
| H  | 18.989588063 | 15.376816028 | 3.753871134  |
| Ni | 13.480636071 | 19.692848577 | 8.489442023  |
| C  | 10.555046709 | 23.884281406 | 7.601240700  |
| H  | 10.080827557 | 23.588879586 | 8.545645414  |
| H  | 11.544189289 | 24.295123254 | 7.832933925  |
| H  | 9.960588999  | 24.690320819 | 7.145316435  |
| C  | 9.253251678  | 22.124988513 | 6.337948111  |
| H  | 9.317742842  | 21.218954278 | 5.725520006  |
| H  | 8.720804397  | 21.863673525 | 7.261696558  |
| H  | 8.652646199  | 22.865303414 | 5.787932139  |
| C  | 15.582737666 | 13.449707036 | 13.767028628 |
| O  | 15.134744022 | 12.725440298 | 14.634338657 |
| N  | 15.871848375 | 12.996996096 | 12.503323952 |
| H  | 15.649416733 | 12.039320169 | 12.270685457 |
| H  | 16.278044246 | 13.590158788 | 11.795980894 |

**Cartesian coordinates of the DFT geometry-optimized backbone Ni<sup>II</sup>Rd model in the gas phase**

|   |              |              |              |
|---|--------------|--------------|--------------|
| C | 9.234716709  | 13.647291782 | 11.529853765 |
| C | 10.688372206 | 13.989731608 | 11.217359969 |
| O | 11.569666293 | 13.138470761 | 11.200769713 |
| H | 9.214292222  | 12.882039336 | 12.312805963 |
| H | 8.661009740  | 14.526005974 | 11.844786679 |
| H | 8.767110902  | 13.218396556 | 10.633288416 |
| N | 10.904564086 | 15.301277092 | 10.922196687 |
| C | 12.258000000 | 15.820000029 | 10.730999981 |
| C | 12.799026718 | 16.190634073 | 12.125948138 |
| O | 12.265579387 | 17.054394454 | 12.814168410 |
| C | 12.258334119 | 17.039715088 | 9.817244842  |
| S | 13.931734447 | 17.730855647 | 9.581938537  |
| H | 10.183486378 | 15.970075652 | 11.194861180 |
| H | 12.857171691 | 15.014664158 | 10.294498289 |
| H | 11.616754565 | 17.809041084 | 10.254087300 |
| H | 11.832587711 | 16.759016312 | 8.846495015  |
| N | 13.879191461 | 15.486741620 | 12.561001098 |
| C | 14.535000021 | 15.771999993 | 13.827000015 |
| C | 15.290564609 | 17.113895401 | 13.885735085 |
| O | 15.824755123 | 17.437656085 | 14.937268425 |
| H | 14.260724774 | 14.784246312 | 11.945439076 |
| H | 13.791233099 | 15.816443654 | 14.632260905 |
| H | 15.243394491 | 14.971535870 | 14.065090070 |
| N | 15.302214378 | 17.841268736 | 12.744722930 |
| C | 15.790729479 | 19.200991302 | 12.694598902 |
| C | 14.729244933 | 20.288508238 | 12.940426239 |
| O | 14.945981827 | 21.180066799 | 13.747571972 |
| H | 14.848307862 | 17.501088219 | 11.896758711 |
| H | 16.232497424 | 19.382048469 | 11.704289809 |
| H | 16.549313018 | 19.340505951 | 13.468508421 |
| N | 13.593126702 | 20.212284425 | 12.180648096 |
| C | 12.663999904 | 21.328999922 | 12.150000024 |
| C | 11.226274522 | 21.020820102 | 12.615347262 |
| O | 10.391602226 | 21.916982711 | 12.649068153 |
| C | 12.582131966 | 22.016114479 | 10.773771997 |
| S | 11.736187688 | 21.076677083 | 9.436197115  |
| H | 13.572165358 | 19.540195752 | 11.408706967 |
| H | 13.057140367 | 22.057745633 | 12.870157370 |

|   |              |              |              |
|---|--------------|--------------|--------------|
| H | 12.012578575 | 22.940221723 | 10.912663520 |
| H | 13.597762657 | 22.280275015 | 10.458835520 |
| N | 10.936309452 | 19.730734440 | 12.938532678 |
| C | 9.565000080  | 19.275999066 | 13.082999980 |
| C | 9.204843310  | 18.344281253 | 11.912278634 |
| O | 8.769417858  | 17.205506286 | 12.093283850 |
| H | 11.657970470 | 19.015253110 | 12.874522122 |
| H | 9.417397083  | 18.700114121 | 14.003707958 |
| H | 8.925759401  | 20.166540158 | 13.088344401 |
| N | 9.423802347  | 18.861499679 | 10.683700089 |
| H | 10.001863629 | 19.691545438 | 10.510554797 |
| H | 9.305615358  | 18.241206432 | 9.893945669  |
| C | 15.426632813 | 15.925662316 | 1.938538429  |
| C | 14.194332316 | 16.699612294 | 2.386125557  |
| O | 13.174021656 | 16.777768826 | 1.707649084  |
| H | 15.123501439 | 15.182945455 | 1.194825601  |
| H | 15.926928265 | 15.446788773 | 2.788814358  |
| H | 16.137551164 | 16.621264229 | 1.471385077  |
| N | 14.319698660 | 17.323390078 | 3.581514961  |
| C | 13.205774143 | 18.065052545 | 4.149065828  |
| C | 12.911000030 | 19.325000967 | 3.304000008  |
| O | 13.808779331 | 20.119083513 | 3.022958001  |
| C | 13.564976453 | 18.455610542 | 5.586900385  |
| S | 12.206650337 | 19.271656404 | 6.492600705  |
| H | 15.127579398 | 17.136992969 | 4.165786292  |
| H | 12.326679547 | 17.412169997 | 4.157764281  |
| H | 14.428438307 | 19.125452801 | 5.558372817  |
| H | 13.873946041 | 17.554594783 | 6.131576968  |
| N | 11.629067436 | 19.556463351 | 2.950945895  |
| C | 11.299111519 | 20.787812609 | 2.245198183  |
| C | 11.301999962 | 22.035999048 | 3.145999992  |
| O | 11.161560962 | 23.138421183 | 2.631393818  |
| C | 9.905063170  | 20.500374849 | 1.660453502  |
| C | 9.295119355  | 19.526403286 | 2.678918627  |
| C | 10.483051323 | 18.651819717 | 3.103757633  |
| H | 12.045567015 | 20.993707098 | 1.470619462  |
| H | 9.335067866  | 21.424680396 | 1.522960485  |
| H | 10.010513835 | 20.011422685 | 0.682220274  |
| H | 8.466807584  | 18.932249173 | 2.274150563  |
| H | 8.922676468  | 20.085243092 | 3.547511174  |

|    |              |              |             |
|----|--------------|--------------|-------------|
| H  | 10.389658141 | 18.306427254 | 4.139051177 |
| H  | 10.620267668 | 17.779459324 | 2.449184160 |
| N  | 11.401245675 | 21.815963977 | 4.477095065 |
| C  | 11.511737258 | 22.899237900 | 5.429877036 |
| C  | 12.950073010 | 23.343647596 | 5.736797474 |
| O  | 13.247187965 | 24.529105822 | 5.756956643 |
| H  | 11.566099405 | 20.877673928 | 4.849758248 |
| H  | 10.994843834 | 23.779268642 | 5.039229456 |
| H  | 11.050886695 | 22.583561601 | 6.376633509 |
| N  | 13.826991151 | 22.330419008 | 6.004761086 |
| C  | 15.164822884 | 22.625495169 | 6.474781260 |
| C  | 16.297001005 | 22.136998984 | 5.576000024 |
| O  | 17.452901347 | 22.478937573 | 5.791599861 |
| C  | 15.434345236 | 22.098411373 | 7.895331657 |
| S  | 15.504000240 | 20.271562033 | 8.031255125 |
| H  | 13.438660090 | 21.402107120 | 6.193737062 |
| H  | 15.242437346 | 23.720261557 | 6.482970931 |
| H  | 16.404826422 | 22.493115057 | 8.213646710 |
| H  | 14.661160892 | 22.490889431 | 8.564075843 |
| N  | 15.971667058 | 21.261066005 | 4.580835886 |
| C  | 16.975622757 | 20.727211958 | 3.695405852 |
| C  | 17.761000001 | 19.506999984 | 4.199999982 |
| O  | 18.770007509 | 19.125635282 | 3.603162605 |
| H  | 15.001772042 | 21.085498133 | 4.330780760 |
| H  | 17.727817129 | 21.486548099 | 3.449963549 |
| H  | 16.475356620 | 20.410342616 | 2.772309631 |
| N  | 17.239716713 | 18.883223722 | 5.281157876 |
| C  | 17.895110442 | 17.743143958 | 5.895278275 |
| C  | 17.825999997 | 16.510000013 | 4.976000002 |
| O  | 16.858008686 | 15.760096638 | 4.982135137 |
| H  | 16.542986299 | 19.377316236 | 5.849659676 |
| H  | 18.941321459 | 17.979037699 | 6.139302079 |
| H  | 17.355995991 | 17.504337929 | 6.816140477 |
| N  | 18.897767470 | 16.368172383 | 4.144739184 |
| H  | 19.326496341 | 17.257862451 | 3.878043847 |
| H  | 18.775720390 | 15.686856702 | 3.405500740 |
| Ni | 13.338978312 | 19.720260263 | 8.512712724 |

**Cartesian coordinates of the DFT geometry-optimized NACA Ni<sup>II</sup>Rd model in the gas phase**

|    |             |             |             |
|----|-------------|-------------|-------------|
| N  | 10.67242585 | 15.34118893 | 9.91207449  |
| C  | 12.01274000 | 15.79711000 | 10.25243000 |
| C  | 12.13496916 | 15.85329926 | 11.77367905 |
| O  | 11.12816346 | 15.99474948 | 12.45714062 |
| C  | 12.21723465 | 17.19796556 | 9.60706713  |
| S  | 13.90079440 | 17.89034292 | 9.61563336  |
| N  | 13.53687055 | 20.10459396 | 12.16861025 |
| C  | 12.60623000 | 21.22081000 | 12.20405000 |
| C  | 11.22425128 | 20.87763647 | 12.77925330 |
| O  | 10.53784629 | 21.78785356 | 13.22343535 |
| C  | 12.45207787 | 21.89139744 | 10.82184438 |
| S  | 11.66128754 | 20.90748720 | 9.49774852  |
| N  | 14.60438669 | 17.04606551 | 3.82417643  |
| C  | 13.50244000 | 17.87264000 | 4.28356000  |
| C  | 13.33375970 | 19.06154010 | 3.32813878  |
| O  | 14.31726118 | 19.60491610 | 2.84906755  |
| C  | 13.72747580 | 18.31916968 | 5.74582673  |
| S  | 12.38920941 | 19.36144834 | 6.44668687  |
| N  | 13.82277488 | 22.56403233 | 6.14551679  |
| C  | 15.09253000 | 22.95186000 | 6.73021000  |
| C  | 16.31827984 | 22.40082992 | 5.98024321  |
| O  | 17.43091359 | 22.79909018 | 6.29322354  |
| C  | 15.17909103 | 22.64446551 | 8.23317609  |
| S  | 15.43780170 | 20.89534114 | 8.71601939  |
| Ni | 13.41795883 | 19.84522182 | 8.46690498  |
| C  | 16.09746745 | 21.43089813 | 4.85428065  |
| C  | 13.50741030 | 15.78193215 | 12.37395155 |
| C  | 11.92725117 | 19.47371270 | 2.99250453  |
| C  | 10.33935191 | 14.89142124 | 8.68126877  |
| C  | 14.48867928 | 15.72690253 | 3.55077563  |
| C  | 13.22784371 | 23.28348729 | 5.17217859  |
| C  | 14.24255014 | 19.63175235 | 13.21918692 |
| O  | 13.74881786 | 24.29904414 | 4.67904870  |
| C  | 11.85761454 | 22.81096078 | 4.73405928  |
| C  | 15.74725246 | 15.04117678 | 3.05757634  |
| O  | 13.43180488 | 15.10105307 | 3.71282283  |
| O  | 11.18783538 | 14.57078159 | 7.83754761  |
| C  | 8.85603903  | 14.83361038 | 8.37780725  |

|   |             |             |             |
|---|-------------|-------------|-------------|
| C | 10.75167836 | 19.45139946 | 12.74160794 |
| C | 13.99430822 | 20.25272417 | 14.58254820 |
| O | 15.06268762 | 18.70911132 | 13.09124384 |
| H | 9.93602655  | 15.65059904 | 10.54153194 |
| H | 11.53808511 | 17.90638346 | 10.09783230 |
| H | 11.88998789 | 17.10950530 | 8.56513921  |
| H | 13.66984372 | 19.59336317 | 11.28129738 |
| H | 13.45290996 | 22.19537535 | 10.49689052 |
| H | 11.85588790 | 22.79906411 | 10.97967132 |
| H | 14.68432869 | 18.85357224 | 5.80956776  |
| H | 13.82688962 | 17.41245516 | 6.35552521  |
| H | 13.39588327 | 21.67289903 | 6.42651925  |
| H | 14.26906280 | 23.03544559 | 8.70487998  |
| H | 16.02585724 | 23.21658812 | 8.63013247  |
| H | 15.64395991 | 21.96354371 | 4.00457273  |
| H | 15.38470138 | 20.65236180 | 5.14083813  |
| H | 17.04608052 | 20.98372808 | 4.53423199  |
| H | 14.12608429 | 15.03179890 | 11.86513441 |
| H | 13.44189487 | 15.56101042 | 13.44647434 |
| H | 14.00534648 | 16.75728911 | 12.23605460 |
| H | 11.33124768 | 19.55560253 | 3.91076661  |
| H | 11.46963315 | 18.68342007 | 2.37595593  |
| H | 11.91378883 | 20.41924105 | 2.43880534  |
| H | 11.63025400 | 21.80127541 | 5.09589251  |
| H | 11.79340284 | 22.83700609 | 3.63877671  |
| H | 11.10526093 | 23.50921715 | 5.12916632  |
| H | 16.52541896 | 15.74521894 | 2.73780646  |
| H | 15.48959292 | 14.38010064 | 2.22077817  |
| H | 16.15151883 | 14.41428250 | 3.86586481  |
| H | 8.22891357  | 14.96614175 | 9.26822052  |
| H | 8.61091780  | 13.88120945 | 7.89037614  |
| H | 8.61895326  | 15.63986298 | 7.66842695  |
| H | 11.45175905 | 18.78407080 | 13.26045098 |
| H | 10.73356597 | 19.12364897 | 11.69142677 |
| H | 9.75391326  | 19.36434320 | 13.18641180 |
| H | 12.94287720 | 20.14629969 | 14.88686196 |
| H | 14.23647272 | 21.32481123 | 14.59331435 |
| H | 14.62389246 | 19.74135166 | 15.31735758 |
| H | 15.47225316 | 17.52259288 | 3.59584227  |
| H | 12.60133121 | 17.25197169 | 4.24100436  |

|   |             |             |             |
|---|-------------|-------------|-------------|
| H | 12.74617585 | 15.09603371 | 9.84063129  |
| H | 15.16053885 | 24.04293264 | 6.61306891  |
| H | 13.01472100 | 21.99682492 | 12.86491637 |



**Cartesian coordinates of the DFT geometry-optimized full Ni<sup>II</sup>Rd model without constraints in the gas phase**

|   |             |             |             |
|---|-------------|-------------|-------------|
| C | 8.114066814 | 15.59405005 | 12.53924502 |
| C | 9.51588413  | 15.26449929 | 12.0430949  |
| O | 10.04666753 | 14.1778159  | 12.23015994 |
| H | 7.619362843 | 14.66213499 | 12.82687654 |
| H | 7.524676729 | 16.11532574 | 11.77538569 |
| H | 8.154783728 | 16.26278147 | 13.40772867 |
| N | 10.13538133 | 16.27606096 | 11.37487394 |
| C | 11.51609217 | 16.17201122 | 10.95270477 |
| C | 12.46846524 | 16.14772315 | 12.15775717 |
| O | 12.28187552 | 16.8177104  | 13.16734056 |
| C | 11.83668868 | 17.38063889 | 10.05723547 |
| S | 13.59003998 | 17.66233749 | 9.61473137  |
| H | 9.693207922 | 17.18956851 | 11.32070372 |
| H | 11.64507462 | 15.23431448 | 10.39406042 |
| H | 11.25420969 | 17.30257982 | 9.132170444 |
| H | 11.49452619 | 18.28066818 | 10.57291801 |
| N | 13.57166694 | 15.39986547 | 11.93603087 |
| C | 14.76471658 | 15.35408583 | 12.75667971 |
| C | 15.13414182 | 16.69998347 | 13.42208264 |
| O | 15.55876725 | 16.72270206 | 14.56624529 |
| C | 16.00001155 | 14.95989703 | 11.89523857 |
| C | 15.77346464 | 13.88221106 | 10.84154308 |
| O | 16.06303446 | 12.71073385 | 11.01319165 |
| N | 15.20004024 | 14.3461348  | 9.686787467 |
| H | 13.60369677 | 14.90649957 | 11.05414219 |
| H | 14.64332691 | 14.63695323 | 13.57830277 |
| H | 16.3652675  | 15.85925328 | 11.38814861 |
| H | 16.78234955 | 14.60188706 | 12.5698931  |
| H | 15.02497239 | 15.33249019 | 9.50091384  |
| H | 15.07537004 | 13.69296026 | 8.92552797  |
| N | 15.11507934 | 17.75855507 | 12.57678231 |
| C | 15.68732353 | 19.04386883 | 12.91927189 |
| C | 14.65648754 | 20.16509641 | 13.08624919 |
| O | 14.80744129 | 20.99986236 | 13.96867546 |
| C | 16.81449385 | 19.40077875 | 11.91062798 |
| C | 17.16855253 | 20.88920952 | 11.88953773 |
| C | 18.04617402 | 18.54293016 | 12.22432149 |
| H | 14.69084232 | 17.65604519 | 11.64659265 |

|   |             |             |             |
|---|-------------|-------------|-------------|
| H | 16.11906487 | 18.93680752 | 13.9194966  |
| H | 16.4402929  | 19.14596841 | 10.90802042 |
| H | 17.78827415 | 17.48050813 | 12.30641583 |
| H | 18.81350096 | 18.6473645  | 11.4467031  |
| H | 18.49048747 | 18.85180369 | 13.18112568 |
| H | 16.33651363 | 21.48485039 | 11.49996703 |
| H | 17.41439663 | 21.25768467 | 12.89408744 |
| H | 18.02631224 | 21.05916921 | 11.22646456 |
| N | 13.61286767 | 20.19357497 | 12.20983042 |
| C | 12.62888321 | 21.25358645 | 12.28851022 |
| C | 11.32637665 | 20.84735985 | 12.9903744  |
| O | 10.47622555 | 21.68332459 | 13.26858172 |
| C | 12.3136359  | 21.90130798 | 10.93033984 |
| S | 11.46055087 | 20.83009582 | 9.704949668 |
| H | 13.58648717 | 19.54591804 | 11.42223926 |
| H | 13.06700523 | 22.02255917 | 12.93726913 |
| H | 11.65300053 | 22.75118569 | 11.13037176 |
| H | 13.24721868 | 22.28378954 | 10.50238351 |
| N | 11.15366846 | 19.52340914 | 13.23726896 |
| C | 9.926372076 | 19.03598864 | 13.80385773 |
| C | 8.710360276 | 19.06454047 | 12.86991468 |
| O | 7.590024376 | 18.83466658 | 13.30045138 |
| H | 11.89273894 | 18.84532295 | 13.07611923 |
| H | 10.08743175 | 17.99245517 | 14.09812967 |
| H | 9.633517489 | 19.60942813 | 14.6922297  |
| N | 8.970313707 | 19.24818466 | 11.54139913 |
| H | 9.82551812  | 19.70342879 | 11.20722555 |
| H | 8.153720831 | 19.39977768 | 10.96298016 |
| C | 15.75337024 | 15.3098115  | 2.651598493 |
| C | 14.52667502 | 16.13992055 | 2.994986336 |
| O | 13.57538956 | 16.24627176 | 2.225832246 |
| H | 15.4533244  | 14.49701633 | 1.983437301 |
| H | 16.24185497 | 14.91972144 | 3.551328509 |
| H | 16.46480154 | 15.95259348 | 2.114789366 |
| N | 14.57679935 | 16.78093266 | 4.186277298 |
| C | 13.47682967 | 17.63974772 | 4.593196965 |
| C | 13.35243633 | 18.82513398 | 3.626119184 |
| O | 14.32522136 | 19.54446681 | 3.39448588  |
| C | 13.72146904 | 18.18649378 | 6.000162552 |
| S | 12.31413301 | 19.18264974 | 6.605561776 |

|   |             |             |             |
|---|-------------|-------------|-------------|
| H | 15.34186935 | 16.60321835 | 4.831344482 |
| H | 12.55363732 | 17.05129592 | 4.59028782  |
| H | 14.6267138  | 18.80257819 | 5.986954076 |
| H | 13.88759619 | 17.35521443 | 6.694741176 |
| N | 12.13420519 | 19.10099405 | 3.108777477 |
| C | 11.95879804 | 20.24824219 | 2.222689314 |
| C | 11.72045029 | 21.58925646 | 2.947039856 |
| O | 11.51709915 | 22.59363225 | 2.2761184   |
| C | 10.74128276 | 19.85373554 | 1.375824087 |
| C | 9.896056211 | 19.04356854 | 2.369144234 |
| C | 10.94109589 | 18.24205175 | 3.16142684  |
| H | 12.86473875 | 20.3961975  | 1.625190796 |
| H | 10.23979801 | 20.7380544  | 0.97049438  |
| H | 11.0659444  | 19.21760939 | 0.541490149 |
| H | 9.360840785 | 19.72640209 | 3.042871096 |
| H | 9.154195142 | 18.39466459 | 1.888640731 |
| H | 11.17569973 | 17.28033796 | 2.685330873 |
| H | 10.63129675 | 18.06361602 | 4.197578876 |
| N | 11.73979982 | 21.54851719 | 4.296989436 |
| C | 11.64676064 | 22.74163805 | 5.119647141 |
| C | 13.04309622 | 23.2378939  | 5.534672756 |
| O | 13.35059533 | 24.41844085 | 5.44548799  |
| C | 10.75573747 | 22.5065127  | 6.365035076 |
| C | 10.58910716 | 23.79230418 | 7.178668341 |
| C | 9.395293429 | 21.9145248  | 5.984673048 |
| H | 11.92592087 | 20.66829622 | 4.785048304 |
| H | 11.23065757 | 23.53796463 | 4.492708204 |
| H | 11.26250639 | 21.7804401  | 7.012995385 |
| H | 10.05104933 | 23.57117361 | 8.108450047 |
| H | 11.55489352 | 24.23449565 | 7.447113511 |
| H | 10.02508975 | 24.54756912 | 6.611756435 |
| H | 8.799616119 | 21.7326685  | 6.888109467 |
| H | 9.50685047  | 20.95930521 | 5.460359152 |
| H | 8.833150328 | 22.59921581 | 5.332400346 |
| N | 13.88144097 | 22.27494421 | 6.022336804 |
| C | 15.17606824 | 22.63377647 | 6.56147032  |
| C | 16.37278418 | 22.0962721  | 5.77211199  |
| O | 17.51539128 | 22.43955411 | 6.050325908 |
| C | 15.3211028  | 22.2652849  | 8.044350832 |
| S | 15.38537495 | 20.46860123 | 8.390065128 |

|    |             |             |             |
|----|-------------|-------------|-------------|
| H  | 13.5054927  | 21.34618199 | 6.233040323 |
| H  | 15.24007211 | 23.72585853 | 6.462741819 |
| H  | 14.50115588 | 22.73430469 | 8.599623632 |
| H  | 16.26562362 | 22.69099432 | 8.399024809 |
| N  | 16.09547236 | 21.22357484 | 4.770074746 |
| C  | 17.13180605 | 20.73365298 | 3.906662223 |
| C  | 17.99840893 | 19.6073251  | 4.451864108 |
| O  | 18.99523292 | 19.24920473 | 3.813923552 |
| H  | 15.14374221 | 20.95898514 | 4.536963971 |
| H  | 16.66071132 | 20.34014992 | 2.999427287 |
| H  | 17.82661021 | 21.53575697 | 3.628263978 |
| N  | 17.6009073  | 19.00398133 | 5.592974206 |
| C  | 18.38601147 | 17.90620105 | 6.15080598  |
| C  | 18.02501732 | 16.62849706 | 5.359482425 |
| O  | 17.15666199 | 15.82535644 | 5.691278346 |
| C  | 18.28676003 | 17.80679438 | 7.683344889 |
| C  | 18.7781966  | 19.12529165 | 8.304170202 |
| C  | 16.90721903 | 17.397908   | 8.218093602 |
| H  | 16.82163689 | 19.393997   | 6.122224662 |
| H  | 19.43202704 | 18.13441697 | 5.905808945 |
| H  | 18.99861244 | 17.01335294 | 7.96304933  |
| H  | 19.77944835 | 19.39252873 | 7.93872503  |
| H  | 18.09554692 | 19.95055876 | 8.076222116 |
| H  | 18.82049601 | 19.0368237  | 9.394419767 |
| H  | 16.66467301 | 16.36995819 | 7.940708143 |
| H  | 16.89384042 | 17.49382278 | 9.310142022 |
| H  | 16.11308491 | 18.04809266 | 7.842251173 |
| N  | 18.7469031  | 16.50323076 | 4.215010211 |
| H  | 19.16862213 | 17.36302639 | 3.851801011 |
| H  | 18.42919569 | 15.80441651 | 3.556765497 |
| Ni | 13.23191947 | 19.78966177 | 8.658135905 |

**Cartesian coordinates of the DFT geometry-optimized full Ni<sup>III</sup>Rd model in the gas phase**

|   |              |              |              |
|---|--------------|--------------|--------------|
| C | 9.098480915  | 14.141721060 | 11.979928239 |
| C | 10.578042998 | 14.350236295 | 11.714288406 |
| O | 11.457377033 | 13.637771975 | 12.174921554 |
| H | 8.984818312  | 13.393919603 | 12.768589875 |
| H | 8.601288945  | 13.777316459 | 11.070870357 |
| H | 8.615446789  | 15.082654828 | 12.275218522 |
| N | 10.874120315 | 15.403846223 | 10.887398844 |
| C | 12.257999984 | 15.819999997 | 10.730999980 |
| C | 12.825886701 | 16.187778918 | 12.122863314 |
| O | 12.256758549 | 17.010259915 | 12.833726178 |
| C | 12.290283520 | 17.061217863 | 9.825505282  |
| S | 13.929894622 | 17.871651407 | 9.680098122  |
| H | 10.175680467 | 16.130237087 | 10.787276299 |
| H | 12.841526373 | 14.997326797 | 10.299949034 |
| H | 11.937763672 | 16.790012776 | 8.824233983  |
| H | 11.597768787 | 17.793726236 | 10.241341663 |
| N | 13.987991465 | 15.595085029 | 12.486692561 |
| C | 14.535000016 | 15.771999995 | 13.827000017 |
| C | 14.940674835 | 17.230401345 | 14.139760508 |
| O | 15.098256674 | 17.572018193 | 15.299725323 |
| C | 15.812408721 | 14.920356311 | 13.986430866 |
| H | 14.319655085 | 14.788208982 | 11.962426527 |
| H | 13.787888518 | 15.497805386 | 14.583942904 |
| H | 16.150377397 | 15.012856132 | 15.023809844 |
| H | 16.590120167 | 15.343312809 | 13.337635593 |
| N | 15.213624740 | 18.000816334 | 13.055809325 |
| C | 15.700729119 | 19.365405111 | 13.146281444 |
| C | 14.599374291 | 20.437850325 | 13.139816559 |
| O | 14.673772952 | 21.394263346 | 13.894242623 |
| C | 16.752885380 | 19.613372029 | 12.028914566 |
| C | 16.973074755 | 21.097345475 | 11.716999900 |
| C | 18.069059961 | 18.922766894 | 12.405134098 |
| H | 14.990772291 | 17.634905529 | 12.135323693 |
| H | 16.166420985 | 19.479273936 | 14.130991396 |
| H | 16.361753879 | 19.144950437 | 11.112890703 |
| H | 17.909046751 | 17.872180829 | 12.679829087 |
| H | 18.534243228 | 19.425829971 | 13.264345568 |
| H | 18.781077472 | 18.954326598 | 11.571140606 |

|   |              |              |              |
|---|--------------|--------------|--------------|
| H | 16.069884362 | 21.554882515 | 11.299605886 |
| H | 17.250940174 | 21.659869527 | 12.617034861 |
| H | 17.769037419 | 21.211697297 | 10.970596050 |
| N | 13.607155744 | 20.296364827 | 12.212186182 |
| C | 12.612249538 | 21.330726525 | 12.040285775 |
| C | 11.193276555 | 20.957442116 | 12.514501177 |
| O | 10.318161688 | 21.812046985 | 12.536941728 |
| C | 12.469114887 | 21.787198123 | 10.579312258 |
| S | 11.609137208 | 20.615597151 | 9.445317128  |
| H | 13.636770204 | 19.524471680 | 11.547366578 |
| H | 12.931335465 | 22.182525930 | 12.650966994 |
| H | 13.453804160 | 22.046850744 | 10.179656886 |
| H | 11.845535761 | 22.687346570 | 10.564156070 |
| N | 10.968108577 | 19.645993762 | 12.787221092 |
| C | 9.655468625  | 19.162696370 | 13.131760611 |
| C | 8.978692270  | 18.269417417 | 12.091436921 |
| O | 8.172498298  | 17.410409089 | 12.422076336 |
| H | 11.728362198 | 18.971273535 | 12.801746699 |
| H | 9.672960605  | 18.583905187 | 14.062579460 |
| H | 9.010523335  | 20.039019935 | 13.279501372 |
| N | 9.309061377  | 18.518484994 | 10.796179119 |
| H | 9.932646433  | 19.280658661 | 10.530711743 |
| H | 8.743449989  | 18.087669636 | 10.077645204 |
| C | 15.441171174 | 16.282638821 | 1.656986713  |
| C | 14.210598510 | 16.929187735 | 2.268595999  |
| O | 13.153265121 | 17.062171951 | 1.657273449  |
| H | 15.124345424 | 15.478474788 | 0.985677560  |
| H | 15.974407650 | 17.033657956 | 1.059292465  |
| H | 16.129100678 | 15.902002725 | 2.419670448  |
| N | 14.369058316 | 17.382643743 | 3.534585135  |
| C | 13.282464956 | 18.088976581 | 4.175381365  |
| C | 12.925099648 | 19.341910175 | 3.359940075  |
| O | 13.799303648 | 20.151551896 | 3.051923036  |
| C | 13.739062746 | 18.500910377 | 5.582483826  |
| S | 12.423970577 | 19.354964445 | 6.530405003  |
| H | 15.247041102 | 17.255234391 | 4.036941700  |
| H | 12.410926766 | 17.428048165 | 4.245513800  |
| H | 14.068110610 | 17.615705029 | 6.135598467  |
| H | 14.595344576 | 19.170119414 | 5.484733279  |
| N | 11.623902189 | 19.570047518 | 3.068348556  |

|   |              |              |             |
|---|--------------|--------------|-------------|
| C | 11.265458084 | 20.750190696 | 2.279571343 |
| C | 11.182065776 | 22.050479808 | 3.094392784 |
| O | 10.937134179 | 23.106644256 | 2.533092576 |
| C | 9.922064094  | 20.364554211 | 1.639272939 |
| C | 9.307915520  | 19.406628174 | 2.668408730 |
| C | 10.515645064 | 18.609050262 | 3.178686179 |
| H | 12.042156265 | 20.938800258 | 1.530028746 |
| H | 9.314889439  | 21.249337950 | 1.425391825 |
| H | 10.108222426 | 19.836633425 | 0.695165722 |
| H | 8.860710364  | 19.979595176 | 3.491702240 |
| H | 8.531998942  | 18.755834803 | 2.249537354 |
| H | 10.735057915 | 17.737801213 | 2.546652542 |
| H | 10.381809157 | 18.271529008 | 4.212754130 |
| N | 11.389361450 | 21.911986597 | 4.423837612 |
| C | 11.415746727 | 23.024955247 | 5.346831144 |
| C | 12.854780391 | 23.434945344 | 5.714188005 |
| O | 13.166981945 | 24.608803467 | 5.828403722 |
| C | 10.581457570 | 22.689864989 | 6.608406316 |
| H | 11.563397277 | 20.985038715 | 4.797075291 |
| H | 10.993734897 | 23.891153348 | 4.825225842 |
| H | 11.076995613 | 21.852762499 | 7.116339786 |
| N | 13.725565579 | 22.398574708 | 5.933856148 |
| C | 15.058674837 | 22.631113887 | 6.441940135 |
| C | 16.212325314 | 22.111796567 | 5.575418670 |
| O | 17.365389682 | 22.414841000 | 5.853522191 |
| C | 15.265558972 | 22.085319239 | 7.865653325 |
| S | 15.442424983 | 20.264525293 | 8.037261847 |
| H | 13.347027270 | 21.454768774 | 5.992928033 |
| H | 15.174732265 | 23.721758491 | 6.479312793 |
| H | 16.213353005 | 22.484048473 | 8.243889568 |
| H | 14.461811099 | 22.452141507 | 8.509900278 |
| N | 15.888252184 | 21.248210858 | 4.583712722 |
| C | 16.884248088 | 20.716814332 | 3.687394303 |
| C | 17.826360179 | 19.649579226 | 4.231033732 |
| O | 18.732777287 | 19.233383772 | 3.521717141 |
| H | 14.923358265 | 21.122673559 | 4.287797544 |
| H | 16.353367891 | 20.260156528 | 2.845505887 |
| H | 17.534430180 | 21.510030933 | 3.295242996 |
| N | 17.602044031 | 19.185183526 | 5.488883641 |
| C | 18.413472151 | 18.102117691 | 5.970378601 |

|    |              |              |              |
|----|--------------|--------------|--------------|
| C  | 17.755932994 | 16.758989011 | 5.609963204  |
| O  | 16.692461094 | 16.664300671 | 5.013524130  |
| C  | 18.857942640 | 18.229331082 | 7.457561766  |
| C  | 19.272455580 | 19.675064066 | 7.765969376  |
| C  | 17.835314766 | 17.697677892 | 8.467950689  |
| H  | 16.822303320 | 19.533197101 | 6.040010554  |
| H  | 19.319789568 | 18.140310785 | 5.348459760  |
| H  | 19.765773234 | 17.609814953 | 7.553676135  |
| H  | 17.676349456 | 16.618640449 | 8.359664347  |
| H  | 16.866441011 | 18.190769724 | 8.360438155  |
| H  | 18.183285154 | 17.885127056 | 9.491234829  |
| H  | 20.004446995 | 20.045318533 | 7.037671470  |
| H  | 18.413806141 | 20.353901669 | 7.732461003  |
| H  | 19.718993248 | 19.735131209 | 8.767008780  |
| N  | 18.468377593 | 15.657046382 | 5.957694976  |
| H  | 19.313327101 | 15.721005477 | 6.503339912  |
| H  | 18.071288017 | 14.748040098 | 5.767336555  |
| Ni | 13.373954683 | 19.688662432 | 8.505579137  |
| C  | 10.544509587 | 23.854541232 | 7.598829054  |
| H  | 10.022538756 | 23.546394543 | 8.513571917  |
| H  | 11.549732329 | 24.189968276 | 7.876623618  |
| H  | 10.016292663 | 24.718910415 | 7.172472149  |
| C  | 9.165580733  | 22.235180544 | 6.231654301  |
| H  | 9.185109588  | 21.380841199 | 5.545985422  |
| H  | 8.610849048  | 21.932355465 | 7.129073990  |
| H  | 8.607878726  | 23.044923896 | 5.739170517  |
| C  | 15.635154477 | 13.473934691 | 13.545188547 |
| O  | 15.500244592 | 13.182852514 | 12.364297608 |
| N  | 15.646100892 | 12.536030793 | 14.528732663 |
| H  | 15.642957294 | 12.789483808 | 15.504472185 |
| H  | 15.431303009 | 11.582220585 | 14.271539790 |



**Cartesian coordinates of the DFT geometry-optimized backbone Ni<sup>III</sup>Rd model in the gas phase**

|   |              |              |              |
|---|--------------|--------------|--------------|
| C | 9.152704474  | 14.040688936 | 11.978653979 |
| C | 10.621788027 | 14.272812464 | 11.674513418 |
| O | 11.518823752 | 13.528956919 | 12.045111471 |
| H | 9.070531472  | 13.321144273 | 12.797253869 |
| H | 8.647360562  | 14.978822370 | 12.242827085 |
| H | 8.653064358  | 13.622704754 | 11.094303582 |
| N | 10.882427539 | 15.384822346 | 10.917065277 |
| C | 12.258000017 | 15.820000051 | 10.730999981 |
| C | 12.837258023 | 16.212313787 | 12.108414563 |
| O | 12.320854770 | 17.102165905 | 12.774030745 |
| C | 12.264015947 | 17.058721882 | 9.821907113  |
| S | 13.905129539 | 17.861419825 | 9.659523329  |
| H | 10.170274143 | 16.104022652 | 10.880779000 |
| H | 12.840094733 | 15.001306014 | 10.291541705 |
| H | 11.575626060 | 17.788941093 | 10.250567727 |
| H | 11.896905172 | 16.784361487 | 8.826878282  |
| N | 13.953425791 | 15.552744176 | 12.509709628 |
| C | 14.535000020 | 15.771999975 | 13.827000019 |
| C | 15.074614152 | 17.192975869 | 14.067476798 |
| O | 15.319880346 | 17.546723679 | 15.207265648 |
| H | 14.172155378 | 14.695164030 | 12.023184295 |
| H | 13.800998690 | 15.591507050 | 14.622768602 |
| H | 15.365385163 | 15.071766291 | 13.968728035 |
| N | 15.297435322 | 17.955153544 | 12.961701430 |
| C | 15.792086894 | 19.308734819 | 13.065308722 |
| C | 14.763696540 | 20.453117815 | 13.050251473 |
| O | 15.019288531 | 21.497983459 | 13.624816690 |
| H | 15.041440348 | 17.597680368 | 12.047995610 |
| H | 16.497564887 | 19.505880462 | 12.245720431 |
| H | 16.329920121 | 19.411508687 | 14.011532124 |
| N | 13.619508470 | 20.252271246 | 12.328421724 |
| C | 12.663999888 | 21.328999923 | 12.149999999 |
| C | 11.221073337 | 21.011211932 | 12.588700863 |
| O | 10.389706955 | 21.908069734 | 12.611958881 |
| C | 12.574029232 | 21.815010377 | 10.687035368 |
| S | 11.672639631 | 20.728774863 | 9.489867483  |
| H | 13.555301910 | 19.431472307 | 11.730489006 |
| H | 13.017632494 | 22.161752759 | 12.766998015 |

|   |              |              |              |
|---|--------------|--------------|--------------|
| H | 12.000284247 | 22.747824699 | 10.677443766 |
| H | 13.581708879 | 22.027949464 | 10.318314521 |
| N | 10.919692674 | 19.705522401 | 12.820750716 |
| C | 9.565000085  | 19.275999067 | 13.082999986 |
| C | 8.968601987  | 18.362862090 | 12.009060605 |
| O | 8.195133769  | 17.458269282 | 12.295901888 |
| H | 11.646396126 | 18.994347438 | 12.841671121 |
| H | 9.488598951  | 18.726873062 | 14.029061286 |
| H | 8.944805773  | 20.179113721 | 13.151941257 |
| N | 9.337164978  | 18.647260829 | 10.733819797 |
| H | 9.970232273  | 19.412276751 | 10.499253638 |
| H | 8.858915228  | 18.168316954 | 9.983531509  |
| C | 15.238756229 | 15.940415498 | 1.809120153  |
| C | 14.066079161 | 16.739646765 | 2.347614598  |
| O | 13.038673390 | 16.932927291 | 1.704603181  |
| H | 14.857531804 | 15.172588126 | 1.129091263  |
| H | 15.833577945 | 15.492337432 | 2.612550968  |
| H | 15.887562892 | 16.615346339 | 1.234424879  |
| N | 14.242769524 | 17.266542461 | 3.586072863  |
| C | 13.188605022 | 18.072179192 | 4.175728050  |
| C | 12.911000017 | 19.325001002 | 3.304000029  |
| O | 13.816580634 | 20.118865470 | 3.051817938  |
| C | 13.649389599 | 18.498495350 | 5.574372014  |
| S | 12.362236829 | 19.360979144 | 6.549929972  |
| H | 15.064279557 | 17.019809741 | 4.133092093  |
| H | 12.279848493 | 17.465070764 | 4.253324198  |
| H | 14.507946024 | 19.159295932 | 5.456829424  |
| H | 13.981417714 | 17.615040707 | 6.130822002  |
| N | 11.631496815 | 19.565152194 | 2.951179577  |
| C | 11.319857830 | 20.798594987 | 2.236753897  |
| C | 11.301999967 | 22.035999023 | 3.145999977  |
| O | 11.199252578 | 23.143387520 | 2.643029396  |
| C | 9.948070678  | 20.514410385 | 1.600343605  |
| C | 9.310193523  | 19.511976789 | 2.571658164  |
| C | 10.491015313 | 18.639123563 | 3.015842401  |
| H | 12.091118744 | 21.008993681 | 1.488558820  |
| H | 9.373533267  | 21.435373102 | 1.462581426  |
| H | 10.093698389 | 20.050124804 | 0.616217980  |
| H | 8.506050661  | 18.919435141 | 2.120768025  |
| H | 8.894785311  | 20.045183727 | 3.437160926  |

|    |              |              |             |
|----|--------------|--------------|-------------|
| H  | 10.350678932 | 18.246615840 | 4.028757457 |
| H  | 10.677063269 | 17.795798630 | 2.337600721 |
| N  | 11.360003961 | 21.815765105 | 4.484817824 |
| C  | 11.463939811 | 22.903764451 | 5.430061918 |
| C  | 12.888394037 | 23.329298461 | 5.819839978 |
| O  | 13.140707216 | 24.494256611 | 6.069357092 |
| H  | 11.480350857 | 20.873118070 | 4.838807024 |
| H  | 10.986143784 | 23.791360481 | 5.007313936 |
| H  | 10.944947321 | 22.625125095 | 6.357956879 |
| N  | 13.807783643 | 22.316626791 | 5.909956447 |
| C  | 15.123645933 | 22.567049592 | 6.455578674 |
| C  | 16.297001027 | 22.136998934 | 5.576000019 |
| O  | 17.438354270 | 22.458471809 | 5.872570729 |
| C  | 15.335516897 | 21.963028619 | 7.856970930 |
| S  | 15.465124056 | 20.130594789 | 7.970773955 |
| H  | 13.443158265 | 21.366345167 | 5.935032710 |
| H  | 15.199363051 | 23.657136288 | 6.556933188 |
| H  | 16.290234539 | 22.336512639 | 8.243885790 |
| H  | 14.540836120 | 22.318906771 | 8.519692138 |
| N  | 16.008695986 | 21.298271841 | 4.541049259 |
| C  | 17.049956885 | 20.767380458 | 3.695461544 |
| C  | 17.760999980 | 19.507000043 | 4.199999992 |
| O  | 18.744085163 | 19.063513452 | 3.614441861 |
| H  | 15.050194898 | 21.136580440 | 4.239824371 |
| H  | 17.837700964 | 21.512835379 | 3.534939571 |
| H  | 16.610962082 | 20.509791128 | 2.724968172 |
| N  | 17.219821407 | 18.891927016 | 5.282862543 |
| C  | 17.885379944 | 17.753492827 | 5.883829336 |
| C  | 17.825999999 | 16.509999994 | 4.975999999 |
| O  | 16.778180322 | 15.895510262 | 4.812384975 |
| H  | 16.536371118 | 19.389590640 | 5.851314246 |
| H  | 18.928700207 | 17.996465530 | 6.131310992 |
| H  | 17.356030037 | 17.504483358 | 6.809003795 |
| N  | 19.003830379 | 16.183229531 | 4.380162658 |
| H  | 19.616413329 | 16.969583288 | 4.187476798 |
| H  | 18.949625952 | 15.474895814 | 3.658557729 |
| Ni | 13.368565599 | 19.695426151 | 8.515651320 |

**Cartesian coordinates of the DFT geometry-optimized [FeCp<sub>2</sub>]<sup>0</sup> in the gas phase**

|    |              |              |              |
|----|--------------|--------------|--------------|
| Fe | -1.168895595 | 0.000004047  | 1.468074051  |
| C  | -1.946710401 | -1.741632593 | 0.678908256  |
| C  | 0.239860207  | -0.365867609 | 2.934936129  |
| C  | -0.926593082 | -1.229585023 | -0.170272067 |
| C  | -2.966710056 | -0.755968400 | 0.784619898  |
| C  | -1.021259623 | -0.073239873 | 3.525164991  |
| C  | 0.628919079  | 0.755975165  | 2.151535320  |
| C  | -1.316532035 | 0.073229292  | -0.589023130 |
| C  | -2.577651441 | 0.365864378  | 0.001203653  |
| C  | -1.411198320 | 1.229580345  | 3.106428477  |
| C  | -0.391079263 | 1.741640508  | 2.257256541  |
| H  | -1.935328602 | -2.697022068 | 1.178110168  |
| H  | 0.789852884  | -1.286936004 | 3.041521015  |
| H  | -0.007697577 | -1.729824608 | -0.430437484 |
| H  | -3.863823923 | -0.835692975 | 1.376939458  |
| H  | -1.595377123 | -0.734291049 | 4.154158226  |
| H  | 1.526037972  | 0.835707477  | 1.559224324  |
| H  | -0.742413125 | 0.734273207  | -1.218022471 |
| H  | -3.127642405 | 1.286932426  | -0.105390403 |
| H  | -2.330092928 | 1.729816525  | 3.366602776  |
| H  | -0.402459828 | 2.697036831  | 1.758068123  |

**Cartesian coordinates of the DFT geometry-optimized [FeCp<sub>2</sub>]<sup>+</sup> in the gas phase**

|    |              |              |              |
|----|--------------|--------------|--------------|
| Fe | -1.168862143 | 0.000029337  | 1.468071461  |
| C  | -1.956459825 | -1.751276008 | 0.662881702  |
| C  | 0.250280765  | -0.358719659 | 2.951574224  |
| C  | -0.935117957 | -1.238497656 | -0.187083939 |
| C  | -2.977717806 | -0.764614153 | 0.768448435  |
| C  | -1.012351738 | -0.065825397 | 3.542298762  |
| C  | 0.639951065  | 0.764632986  | 2.167743494  |
| C  | -1.325452730 | 0.065813139  | -0.606169217 |
| C  | -2.588071136 | 0.358716630  | -0.015419860 |
| C  | -1.402673841 | 1.238497594  | 3.123235575  |
| C  | -0.381306075 | 1.751298893  | 2.273309758  |
| H  | -1.943678765 | -2.705478534 | 1.164854380  |
| H  | 0.798415917  | -1.281612282 | 3.054229271  |
| H  | -0.014100781 | -1.737086059 | -0.443788735 |
| H  | -3.873410380 | -0.842558717 | 1.363587350  |
| H  | -1.587709158 | -0.728000282 | 4.169313027  |
| H  | 1.535648550  | 0.842572632  | 1.572613920  |
| H  | -0.750132247 | 0.727960300  | -1.233243973 |
| H  | -3.136235585 | 1.281588330  | -0.118103306 |
| H  | -2.323717544 | 1.737054765  | 3.379908502  |
| H  | -0.394093768 | 2.705504140  | 1.771345018  |

### Supporting References

- (1) Konezny, S. J.; Doherty, M. D.; Luca, O. R.; Crabtree, R. H.; Soloveichik, G. L.; Batista, V. S. Reduction of Systematic Uncertainty in DFT Redox Potentials of Transition-Metal Complexes. *J. Phys. Chem. C* **2012**, *116*, 6349–6356 DOI: 10.1021/jp300485t.
- (2) Isse, A. A.; Gennaro, A. Absolute Potential of the Standard Hydrogen Electrode and the Problem of Interconversion of Potentials in Different Solvents. *J. Phys. Chem. B* **2010**, *114*, 7894–7899 DOI: 10.1021/jp100402x.
